10<sup>th</sup> December 2019

1  
2  
3  
4  
5  
6  
7  
8  
9  
10  
11  
12  
13  
14  
15  
16  
17  
18  
19  
20  
21  
22  
23  
24  
25  
26  
27  
28  
29  
30  
31  
32  
33  
34  
35

## **Molecular determinants of $\beta$ -arrestin coupling to formoterol-bound $\beta_1$ -adrenoceptor**

Yang Lee<sup>1</sup>, Tony Warne<sup>1</sup>, Rony Nehmé<sup>1</sup>, Shubhi Pandey<sup>2</sup>, Hemlata Dwivedi-Agnihotri<sup>2</sup>, Patricia C. Edwards<sup>1</sup> Javier García-Nafría<sup>3,4</sup>,  
Andrew G.W. Leslie<sup>1</sup>, Arun K. Shukla<sup>2</sup> & Christopher G. Tate<sup>1\*</sup>

<sup>1</sup>MRC Laboratory of Molecular Biology, Francis Crick Avenue, Cambridge CB2 0QH, UK

<sup>2</sup>Department of Biological Sciences and Bioengineering, Indian Institute of Technology, Kanpur 208016, India

<sup>3</sup>Institute for Biocomputation and Physics of Complex Systems (BIFI), University of Zaragoza, BIFI-IQFR (CSIC), 50018, Zaragoza, Spain.

<sup>4</sup>Laboratorio de Microscopías Avanzadas, University of Zaragoza, 50018, Zaragoza, Spain

\* Corresponding author

Correspondence for the manuscript:  
Dr. C.G. Tate  
MRC Laboratory of Molecular Biology,  
Francis Crick Avenue,  
Cambridge CB2 0QH, UK

Email [cgt@mrc-lmb.cam.ac.uk](mailto:cgt@mrc-lmb.cam.ac.uk)

Telephone +44-(0)1223-267073

10<sup>th</sup> December 2019

36 **ABSTRACT**

37       The  $\beta_1$ -adrenoceptor ( $\beta_1$ AR) is a G protein-coupled receptor (GPCR)  
38 activated by the hormone noradrenaline, resulting in the coupling of the  
39 heterotrimeric G protein  $G_s$ <sup>1</sup>. G protein-mediated signalling is terminated by  
40 phosphorylation of the receptor C-terminus and coupling of  $\beta$ -arrestin 1 ( $\beta$ arr1,  
41 also known as arrestin-2), which displaces  $G_s$  and induces signalling through the  
42 MAP kinase pathway<sup>2</sup>. The ability of synthetic agonists to induce signalling  
43 preferentially through either G proteins or arrestins (biased agonism)<sup>3</sup> is  
44 important in drug development, as the therapeutic effect may arise from only  
45 one signalling cascade, whilst the other pathway may mediate undesirable side  
46 effects<sup>4</sup>. To understand the molecular basis for arrestin coupling, we determined  
47 the electron cryo-microscopy (cryo-EM) structure of the  $\beta_1$ AR- $\beta$ arr1 complex in  
48 lipid nanodiscs bound to the biased agonist formoterol<sup>5</sup>, and the crystal structure  
49 of formoterol-bound  $\beta_1$ AR coupled to the G protein mimetic nanobody Nb80<sup>6</sup>.  
50  $\beta$ arr1 couples to  $\beta_1$ AR in a distinct manner to how  $G_s$  couples to  $\beta_2$ AR<sup>7</sup>, with the  
51 finger loop of  $\beta$ arr1 occupying a narrower cleft on the intracellular surface  
52 closer to transmembrane helix H7 than the C-terminal  $\alpha 5$  helix of  $G_s$ . The  
53 conformation of the finger loop in  $\beta$ arr1 is different from that adopted by the  
54 finger loop in visual arrestin when it couples to rhodopsin<sup>8</sup>, and its  $\beta$ -turn  
55 configuration is reminiscent of the loop in Nb80 that inserts at the same position.  
56  $\beta_1$ AR coupled to  $\beta$ arr1 showed significant differences in structure compared to  
57  $\beta_1$ AR coupled to Nb80, including an inward movement of extracellular loop 3  
58 (ECL3) and the cytoplasmic ends of H5 and H6. In the orthosteric binding site  
59 there was also weakening of interactions between formoterol and the residues  
60 Ser211<sup>5,42</sup> and Ser215<sup>5,46</sup>, and a reduction in affinity of formoterol for the  $\beta_1$ AR-  
61  $\beta$ arr1 complex compared to  $\beta_1$ AR coupled to mini- $G_s$ . These differences provide  
62 a foundation for the development of small molecules that could bias signalling in  
63 the  $\beta$ -adrenoceptors.

64

65

66       Ligand bias arises through differential activation of the G protein pathway  
67 compared to the arrestin pathway and has been observed in ligands binding to many  
68 different GPCRs such as the  $\mu$ -opioid receptor<sup>9</sup>, the angiotensin receptor ( $AT_1R$ )<sup>10</sup>

10<sup>th</sup> December 2019

69 and the  $\beta$ -adrenoceptors,  $\beta_1$ AR and  $\beta_2$ AR<sup>5,11</sup>. The ligands can show complex  
70 pharmacology. For example, carvedilol is an inverse agonist of  $\beta_1$ AR when G protein  
71 activity is measured, but it is a weak agonist of the MAPK pathway activated by  
72  $\beta$ arr1<sup>11</sup>. In contrast formoterol is an agonist of both pathways, but stimulates the  $\beta$ arr1  
73 pathway more than the G protein pathway<sup>5</sup>. Current theories favour the hypothesis  
74 that GPCRs exist in an ensemble of conformations and that ligands preferentially  
75 stabilise specific conformations<sup>12</sup>. This suggests that the conformation of a receptor  
76 bound to a heterotrimeric G protein could be different from the conformation that  
77 binds  $\beta$ arr. There is considerable spectroscopic evidence to support the existence of  
78 an ensemble of conformations of a GPCR even in the absence of ligands, and that  
79 specific ligands selectively stabilise specific conformations<sup>13-15</sup>. A notable study on  
80 AT<sub>1</sub>R using electron paramagnetic resonance also supports the notion that  $\beta$ arr biased  
81 ligands stabilise a different subset of conformations compared to G protein biased  
82 ligands<sup>16</sup>. Structures have been determined of many different GPCRs and a number of  
83 distinct states have been identified. For example, X-ray crystallography has identified  
84 two major structural states of  $\beta$ -adrenoceptors, comprising a number of inactive  
85 states<sup>17-19</sup> and a number of active states<sup>6,7,20-22</sup>. In the absence of a G protein, the most  
86 thermodynamically stable state of the agonist-bound receptor is very similar to the  
87 inactive state, except for a small contraction of the ligand binding pocket. The active  
88 states have to be stabilised by binding of a G protein or a G protein-mimetic (*e.g.*  
89 nanobody Nb80 or Nb6B9)<sup>6,22</sup> at the intracellular cleft that opens transiently on the  
90 cytoplasmic face of the receptor with increased frequency upon agonist binding<sup>13</sup>.  
91 Although the details of how an agonist activates the  $\beta$ -adrenoceptors is known in  
92 great detail<sup>6,7,17</sup> and also the molecular basis for how G protein coupling increases  
93 ligand affinity<sup>21</sup>, there are few molecular details alluding to the mechanism of biased  
94 agonism. The structure of carvedilol-bound  $\beta_1$ AR has been determined in the inactive  
95 state, and this suggested that interactions of the ligand with the extracellular end of  
96 H7 could promote the biased effect of the ligand as this is not observed in other  
97 unbiased ligands<sup>23</sup>. However, an active-state structure of  $\beta_1$ AR coupled to  $\beta$ arr1 is  
98 required to further understanding of biased signalling, so we determined the cryo-EM  
99 structure of the formoterol-bound  $\beta_1$ AR- $\beta$ arr1 complex.

100 A complex of  $\beta$ arr1 coupled to purified  $\beta_1$ AR could not be formed effectively in  
101 detergent, so  $\beta_1$ AR was inserted into nanodiscs (see Methods). The  $\beta_1$ AR construct

10<sup>th</sup> December 2019

102 contained six mutations to improve thermostability and a sortase sequence to allow  
103 ligation of a phosphorylated peptide (V<sub>2</sub>R<sub>6P</sub>) identical to the C-terminal sequence of  
104 the vasopressin receptor V<sub>2</sub>R. Pharmacological analysis of purified  $\beta_1$ AR in nanodiscs  
105 indicated that coupling of  $\beta$ arr1 caused an increase in agonist affinity (Extended Data  
106 Fig. 1) as observed for coupling of mini-G proteins to detergent-solubilised  $\beta_1$ AR<sup>21</sup>.  
107 This implied that the receptor coupled to arrestin was in an active state, as has been  
108 also observed for other GPCRs<sup>24</sup>. The structure of the formoterol-bound  $\beta_1$ AR- $\beta$ arr1  
109 complex in nanodiscs (Fig. 1a-c) was determined by cryo-EM (see Methods and  
110 Extended Data Figs. 2-5), in the presence of the antibody fragment F<sub>ab</sub>30 that locks  
111 arrestin into an active conformation<sup>25</sup> and was essential to provide sufficient mass for  
112 the alignment of the particles. The overall resolution was 3.3 Å, with the best-resolved  
113 regions of the cryo-EM map at the interface between  $\beta_1$ AR and  $\beta$ arr1, reaching a local  
114 resolution of 3.2 Å (Extended Data Fig. 2 and Table 1). We also determined the  
115 structure of formoterol-bound  $\beta_1$ AR-Nb80 complex in detergent by X-ray  
116 crystallography at 2.9 Å resolution (Fig. 1d and Table 2) to allow a direct comparison  
117 between  $\beta_1$ AR coupled to different proteins but bound to the same ligand. The  $\beta_1$ AR-  
118 Nb80 complex is too small (~50 kDa of ordered protein) for structure determination  
119 by single-particle cryo-EM. The overall structures of formoterol-bound  $\beta_1$ AR in the  
120  $\beta_1$ AR-Nb80 and  $\beta_1$ AR- $\beta$ arr1 complexes were virtually identical (rmsd 0.6 Å).  
121 However, there were small significant differences in the extracellular surface,  
122 intracellular surface and in the orthosteric binding site (discussed below).  $\beta_1$ AR in  
123 complex with  $\beta$ arr1 was also very similar to other structures of  $\beta_1$ AR in an active  
124 state (rmsds ~0.6 Å) and also to  $\beta_2$ AR coupled to heterotrimeric G<sub>s</sub> (PDB 3SN6; rmsd  
125 0.8 Å)<sup>7,21</sup>. This allowed a detailed comparison between  $\beta_1$ AR- $\beta$ arr1,  $\beta_2$ AR-G<sub>s</sub> and  
126  $\beta_1$ AR-Nb80 (see below).

127 The overall structure of  $\beta$ arr1 coupled to  $\beta_1$ AR (Fig. 2) is very similar to the X-  
128 ray structure of S-arrestin (also known as visual arrestin) coupled to rhodopsin<sup>8</sup> (PDB  
129 5W0P; rmsd 1.3 Å, 1853 atoms) and the structure of activated  $\beta$ arr1 coupled to F<sub>ab</sub>30  
130 and the V<sub>2</sub>Rpp peptide<sup>25</sup> (PDB 4JQI; rmsd 1.1 Å, 1861 atoms). The buried surface  
131 area of  $\beta_1$ AR that makes contact to  $\beta$ arr1 (~1200 Å<sup>2</sup>; excluding the phosphopeptide  
132 interface) is slightly smaller than the surface area of rhodopsin making contact to S-  
133 arrestin (~1400 Å<sup>2</sup>). In addition, there is a 20° difference in tilt of arrestin relative to

10<sup>th</sup> December 2019

134 rhodopsin compared to  $\beta_1$ AR (Extended Data Fig. 6). However, the regions of  $\beta_1$ AR  
135 and rhodopsin that make contact to either  $\beta$ arr1 or S-arrestin respectively are  
136 conserved, as are the positions on the arrestin molecules that make contacts to the  
137 receptors (Extended Data Fig. 7 and 8). The position of the C-terminal V<sub>2</sub>R<sub>6P</sub> peptide  
138 in the cryo-EM structure is also virtually identical to the position of the peptide in the  
139 crystal structure of the  $\beta$ arr1-F<sub>ab</sub>30-V<sub>2</sub>Rpp complex (Extended Data Fig. 6), with the  
140 exception of the phosphate on Thr359. Phospho-Thr359 does not make contacts to  
141  $\beta$ arr1 in the  $\beta$ arr1-F<sub>ab</sub>30-V<sub>2</sub>Rpp complex, but it appears to make contact with the tip  
142 of the lariat loop (Lys294, His295) of  $\beta$ arr1 in the  $\beta_1$ AR- $\beta$ arr1 complex. No density  
143 was observed in the  $\beta_1$ AR- $\beta$ arr1 cryo-EM structure equivalent to the N-terminal  
144 region of V<sub>2</sub>Rpp (RTpPPSpLGP) that is adjacent to the finger loop in the  $\beta$ arr1-F<sub>ab</sub>30-  
145 V<sub>2</sub>Rpp structure; this would clash with the new orientation of the finger loop and the  
146 receptor in the  $\beta_1$ AR- $\beta$ arr1 complex. The most significant difference between these  
147 three structures is the orientation and structure of the finger loop region (Fig. 2). In  
148 the activated non-receptor-bound  $\beta$ arr1-F<sub>ab</sub>30-V<sub>2</sub>Rpp structure, the finger loop forms  
149 an unstructured region that does not superpose with either the finger loop in S-arrestin  
150 coupled to rhodopsin or with  $\beta$ arr1 coupled to  $\beta_1$ AR. In contrast, the receptor-bound  
151 finger loop of S-arrestin and  $\beta$ arr1 superpose, but they adopt different structures (Fig.  
152 2). The finger loop of S-arrestin contains a short  $\alpha$ -helical region whereas in  $\beta$ arr1 it  
153 forms a  $\beta$ -hairpin. When the arrestin molecules are aligned, it also appears that the tip  
154 of the  $\beta$ -hairpin of  $\beta$ arr1 protrudes about 5 Å deeper into the receptor than the  $\alpha$ -  
155 helical region of S-arrestin. An interesting observation is that the CDR3 loop of  
156 nanobody Nb80 that inserts into the receptor bears a remarkable resemblance to the  
157 finger loop of  $\beta$ arr1 (Fig. 2), although the polypeptides run in antiparallel directions  
158 and bear little sequence similarity except for the Val-Leu residues at the tip of the  
159 loops.

160 Structure determination of the  $\beta_1$ AR- $\beta$ arr1 complex in nanodiscs showed it in  
161 relation to the lipid bilayer surface (Fig. 1a). This allowed the identification of 32  
162 amino acid residues in  $\beta$ arr1 that potentially interact with lipid head groups, although  
163 ordered density for lipids was not observed. Two regions of arrestins had previously  
164 been suggested as interacting with lipids, the ‘344-loop’ (s18s19 loop) and the ‘197-  
165 loop’ (s11s12 loop)<sup>26,27</sup>. The nomenclature in parentheses is that implemented for

10<sup>th</sup> December 2019

166 arrestins in GPCRdb<sup>28</sup>. Both these loops in  $\beta$ arr1 contain backbone and side chains  
167 apparently buried in the head group region of the lipid bilayer and are flanked by  
168 residues where only the side chain interacts (Extended Data Figs. 8 and 9). Ten  
169 residues at the tip of the s18s19 loop were disordered and their position could  
170 therefore not be determined. Both the s11s12 and s18s19 loops in  $\beta$ arr1 are distant  
171 from the receptor in the complex. In contrast, two other regions of  $\beta$ arr1 that also  
172 appeared to interact with lipids (s8s9 and s15s16) contained residues that also interact  
173 with  $\beta_1$ AR. The mutation L68C at the base of the finger loop is also accessible to the  
174 lipid bilayer, and is consistent with monobromobimane labelling studies, which shows  
175 a change in fluorescence when labelled arrestin couples to a GPCR<sup>29</sup>. Finally, the  $\beta$ -  
176 sheet s15 and the loop s14s15 contain many residues that could also potentially  
177 interact with lipids. It is notable that of the 18 residues in  $\beta$ arr1 that might interact  
178 with lipids through their side chains, 10 are either Lys or Arg. This suggests that  
179 negatively charged lipids such as phosphatidylinositols and/or phosphatidylserine,  
180 may play an important role in arrestin coupling<sup>30</sup> *in vivo*, as has been suggested for  
181 coupling of the G protein  $G_s$ <sup>31</sup>.

182 The structure of the formoterol-bound  $\beta_1$ AR- $\beta$ arr1 complex was compared with  
183 the  $\beta_2$ AR- $G_s$  complex<sup>7</sup>. The amino acid sequences of  $\beta_1$ AR and  $\beta_2$ AR are 59%  
184 identical (excluding the N-terminus and C-terminus) and have very similar inactive  
185 state structures (rmsds 0.4-0.6 Å)<sup>17,19</sup> and active state structures coupled to  
186 nanobodies (rmsds 0.4-0.6 Å)<sup>6,21,22</sup> so the comparison is reasonable. Superposition of  
187  $\beta_1$ AR and  $\beta_2$ AR from the respective complexes (rmsd 1.0 Å, 1634 atoms) shows that  
188 the long axis of  $\beta$ arr1 is at  $\sim 90^\circ$  angle to the long axis of  $G_s$  (Extended Data Fig. 6).  
189 This could have an influence on the coupling efficiency of G proteins compared to  
190 arrestins if the GPCR form dimers<sup>32</sup> and whether coupling occurs or not could be  
191 dictated by which transmembrane helices form the interface. The only significant  
192 difference in secondary structure between the different receptors is that the  
193 cytoplasmic end of H6 is an additional 7 Å away from the receptor in  $\beta_2$ AR coupled  
194 to  $G_s$  compared to  $\beta_1$ AR coupled to  $\beta$ arr (Fig. 2). The cleft in the intracellular face is  
195 thus 8 Å narrower when  $\beta$ arr1 is coupled to  $\beta_1$ AR compared to  $G_s$  coupled to  $\beta_2$ AR  
196 (measured between the C $\alpha$  of Ser346-Arg284 in  $\beta_1$ AR and the C $\alpha$  of Ser329-Lys267  
197 in  $\beta_2$ AR). The amino acid residues forming the interface between  $\beta_1$ AR and  $\beta$ arr1 are  
198 very similar to those forming the interface between  $\beta_2$ AR and  $G_s$  (Fig. 3a). In

10<sup>th</sup> December 2019

199 particular, both complexes rely on extensive contacts between ICL2 and the  
200 cytoplasmic end of H3 of the receptor and either  $\beta$ arr1 or  $G_s$ . However, there are  
201 contacts between the cytoplasmic ends of H2, H3, H7 and H8 in  $\beta_1$ AR and  $\beta$ arr1 that  
202 are absent in the  $\beta_2$ AR- $G_s$  complex. There are also more extensive contacts between  
203 H5 and H6 of  $\beta_2$ AR to  $G_s$  compared to the  $\beta_1$ AR- $\beta$ arr1 complex. The amino acid side  
204 chains in  $\beta_1$ AR and  $\beta_2$ AR at the respective interfaces are also similar in position, with  
205 the exception of Arg<sup>3.50</sup> (Arg139 in  $\beta_1$ AR and Arg131 in  $\beta_2$ AR) in the DRY motif. In  
206 the  $\beta_2$ AR- $G_s$  complex and also in related complexes such as between the adenosine  
207  $A_{2A}$  receptor and  $G_s$ <sup>33</sup>, Arg<sup>3.50</sup> extends away from the helix axis of H3 to form an  
208 interface between Tyr391 of the G protein and the hydrophobic interior of the  
209 receptor (Fig. 3c). In contrast, Arg<sup>3.50</sup> in the  $\beta_1$ AR- $\beta$ arr1 complex adopts a different  
210 rotamer making extensive polar interactions with Asp138<sup>3.51</sup> and Thr76<sup>2.39</sup> in the  
211 receptor and with Asp69 of  $\beta$ arr1 in the finger loop (Fig. 3b). The rotamer of Arg<sup>3.50</sup>  
212 and its interactions to other  $\beta_1$ AR side chains in the  $\beta_1$ AR- $\beta$ arr1 complex is virtually  
213 identical to those observed in inactive state structures of  $\beta_1$ AR and in active state  
214 structures stabilised by nanobodies<sup>17,21</sup>. One final observation in the comparison  
215 between the  $\beta_1$ AR- $\beta$ arr1 complex and the  $\beta_2$ AR- $G_s$  structure is that the  $\alpha 5$  helix of  $G_s$   
216 does not overlap precisely with the position of the finger loop of  $\beta$ arr1 in the  $\beta_1$ AR-  
217  $\beta$ arr1 complex, with the finger loop lying closer to H7-H8 than the  $\alpha 5$ -helix (Figs. 3d  
218 & 3e).

219 Experimental data suggest that formoterol, carmoterol and carvedilol are  
220 arrestin biased ligands and that isoprenaline is a balanced agonist signalling equally  
221 between the G protein and arrestin pathways<sup>5,34</sup> (see Fig. 4d for ligand structures). To  
222 identify elements that may be involved in biased signalling we therefore compared  
223 formoterol-bound  $\beta_1$ AR coupled to  $\beta$ arr1 and to Nb80 (Nb80 being a known mimetic  
224 of the G protein  $G_s$ <sup>6</sup>). The largest differences were observed on the intracellular face  
225 of  $\beta_1$ AR where the ends of H5 and H6 were closer to the receptor core by 6.7 Å (C $\alpha$   
226 of Ile241) and 1.9 Å (C $\alpha$  of Lys284), respectively, when  $\beta$ arr1 was coupled compared  
227 to when Nb80 was coupled (Fig 4b). On the extracellular face of the receptor (Fig 4c),  
228 the largest change is in ECL3 that occludes the entrance to the orthosteric binding  
229 pocket through a 2.2 Å shift in its position (as measured at C $\alpha$  of Arg317). There was  
230 no significant density for side chains in ECL3 of the  $\beta_1$ AR- $\beta$ arr1 structure, so we

10<sup>th</sup> December 2019

231 cannot compare changes in their interactions. In the orthosteric binding site there was  
232 a significant difference in the interactions between formoterol and the residues  
233 Ser211<sup>5.41</sup> and Ser215<sup>5.46</sup> (Fig. 4a). Three potential hydrogen bonds between  
234 formoterol and either Ser215<sup>5.46</sup> (one hydrogen bond) or Ser211<sup>5.41</sup> (two hydrogen  
235 bonds) are reduced in length by 0.4 Å, 0.8 Å and 0.2 Å, respectively, which is  
236 consistent with the decreased affinity of formoterol when  $\beta$ arr1 is coupled compared  
237 to mini-G<sub>s</sub> (Extended Data Fig. 1). This also correlates with the inward movement of  
238 the cytoplasmic end of H5 by 6.7 Å. In comparison to isoprenaline, formoterol also  
239 makes extra contacts to both H6 (Val326<sup>7.36</sup> and Phe325<sup>7.35</sup>) and ECL2 (D200),  
240 similar to the additional contacts observed in  $\beta_1$ AR structures with bound  
241 carmoterol<sup>17</sup> or carvedilol<sup>23</sup> (Fig. 4a). Previous work identified a causal link between  
242 G protein coupling and changes in the extracellular positions of H6-ECL3-H7 that  
243 resulted in the decreased rates of ligand association/dissociation<sup>35</sup> and an increase in  
244 ligand affinity<sup>21</sup>. The  $\beta_1$ AR- $\beta$ arr1 structure suggests that this region is also implicated  
245 in ligand bias, with the arrestin biased ligands of  $\beta$ -adrenoceptors possessing moieties  
246 that interact with the extracellular end of H6 and ECL2. This would be anticipated to  
247 affect the dynamics of the extracellular region which, in conjunction with the  
248 increased length of hydrogen bonds to H5, would affect the structure on the  
249 intracellular face where G proteins and arrestins couple.

250 The structure of  $\beta_1$ AR- $\beta$ arr1 suggests possibilities of designing biased agonists  
251 that result in repositioning of H5 compared to balanced agonists, and also new  
252 opportunities for developing drugs that bind on the intracellular surface of receptors.  
253 The difference in position of the  $\alpha 5$  helix in  $\beta_2$ AR-G<sub>s</sub> away from H7-H8 offers the  
254 possibility of a small molecule drug binding in this region that would not affect G<sub>s</sub>  
255 coupling, but would sterically block  $\beta$ arr1 binding, resulting in G protein-biased  
256 signalling. Targeting the interfaces between H6 and other helices to prevent the larger  
257 displacement of H6 in the  $\beta_2$ AR-G<sub>s</sub> structure compared to the  $\beta_1$ AR- $\beta$ arr1 structure  
258 would result in arrestin-biased signalling. These approaches are plausible given that  
259 allosteric ligands are known to interfere with receptor signalling when bound to the  
260 intracellular region of a receptor<sup>36</sup> whilst others bind to the lipid-exposed surface of  
261 transmembrane domains<sup>37</sup>. The challenge remains in designing compounds that  
262 specifically target these sites.

263



10<sup>th</sup> December 2019

264

265

266 **Acknowledgements**

267

268 The work in C.G.T.'s laboratory was funded by a grant from the European Research  
269 Council (EMPSI 339995), Heptares Therapeutics Ltd and core funding from the  
270 Medical Research Council [MRC U105197215]. The research program in A.K.S's  
271 laboratory is supported by an Intermediate Fellowship of the Wellcome Trust/DBT  
272 India Alliance Fellowship (grant number IA/I/14/1/501285), the Science and  
273 Engineering Research Board (SERB) (EMR/2017/003804), Innovative Young  
274 Biotechnologist Award from the Department of Biotechnology (DBT)  
275 (BT/08/IYBA/2014-3) and the Indian Institute of Technology, Kanpur. H.D.-A. is  
276 supported by the National Post-Doctoral Fellowship of SERB (PDF/2016/002930)  
277 and DBT-BioCaRE grant (BT/PR31791/BIC/101/1228/2019). We thank Diamond  
278 Light Source (UK) for access and support of the cryo-EM facilities at eBIC (proposal  
279 EM17434) funded by the Wellcome Trust, MRC and BBSRC. We thank the beamline  
280 staff at the European Synchrotron Radiation Facility MASSIF-1 for help with X-ray  
281 diffraction data collection. We thank T. Nakane and P. Kolb for helpful discussions,  
282 D. Gloriam for access to unreleased data from GPCRdb, and G. Cannone from the  
283 LMB EM facility and J. Grimmett and T. Darling from LMB scientific computing for  
284 technical support during this work.

285

286 **Author contributions**

287

288 Y.L. performed receptor, arrestin and zap1 expression, purification, nanodisc  
289 reconstitution and complex formation, cryo-EM grid preparation, data collection, data  
290 processing and model building. T.W. performed receptor and nanobody expression,  
291 purification and complex formation, crystallization, cryo-cooling of the crystals, X-  
292 ray data collection, data processing, and X-ray structure refinement. Y.L. and T.W.  
293 performed the pharmacological analyses. S.P. and H.D.-A. performed F<sub>ab</sub> expression,  
294 purification and validation. R.N. developed the sortase ligation of phosphorylated  
295 peptides onto  $\beta_1$ AR. P.C.E purified mini-G<sub>s</sub>. J.G.-N. advised on cryo-EM data  
296 collection, data processing and model building. A.G.W.L. advised on X-ray data  
297 processing, structure solution and analysis. Y.L. and C.G.T. carried out structure  
298 analysis and manuscript preparation. A.K.S. managed the production of F<sub>ab</sub>. C.G.T.

10<sup>th</sup> December 2019

299 analysed data and managed the overall project. The manuscript was written by C.G.T  
300 and Y.L., and included contributions from all the authors.

301

302 **Author information.** Reprints and permissions information is available at  
303 [www.nature.com/reprints](http://www.nature.com/reprints). The authors declare the following competing interests:  
304 CGT is a shareholder, consultant and member of the Scientific Advisory Board of  
305 Heptares Therapeutics, who also partly funded this work. Correspondence and  
306 requests for materials should be addressed to [cgt@mrc-lmb.cam.ac.uk](mailto:cgt@mrc-lmb.cam.ac.uk).

307

### 308 **References**

309

- 310 1 Evans, B. A., Sato, M., Sarwar, M., Hutchinson, D. S. & Summers, R. J.  
311 Ligand-directed signalling at beta-adrenoceptors. *Br J Pharmacol* **159**, 1022-  
312 1038, (2010).
- 313 2 DeWire, S. M., Ahn, S., Lefkowitz, R. J. & Shenoy, S. K. Beta-arrestins and  
314 cell signaling. *Annu Rev Physiol* **69**, 483-510, (2007).
- 315 3 Smith, J. S., Lefkowitz, R. J. & Rajagopal, S. Biased signalling: from simple  
316 switches to allosteric microprocessors. *Nat Rev Drug Discov* **17**, 243-260,  
317 (2018).
- 318 4 Kenakin, T. Biased Receptor Signaling in Drug Discovery. *Pharmacol Rev* **71**,  
319 267-315, (2019).
- 320 5 Rajagopal, S. *et al.* Quantifying ligand bias at seven-transmembrane receptors.  
321 *Mol Pharmacol* **80**, 367-377, (2011).
- 322 6 Rasmussen, S. G. *et al.* Structure of a nanobody-stabilized active state of the  
323 beta(2) adrenoceptor. *Nature* **469**, 175-180, (2011).
- 324 7 Rasmussen, S. G. *et al.* Crystal structure of the beta2 adrenergic receptor-Gs  
325 protein complex. *Nature* **477**, 549-555, (2011).
- 326 8 Zhou, X. E. *et al.* Identification of Phosphorylation Codes for Arrestin  
327 Recruitment by G Protein-Coupled Receptors. *Cell* **170**, 457-469 e413,  
328 (2017).
- 329 9 Siuda, E. R., Carr, R., Rominger, D. H. & Violin, J. D. Biased mu-opioid  
330 receptor ligands: a promising new generation of pain therapeutics. *Curr Opin*  
331 *Pharmacol* **32**, 77-84, (2017).

10<sup>th</sup> December 2019

- 332 10 Violin, J. D. *et al.* Selectively Engaging beta-Arrestins at the Angiotensin II  
333 Type 1 Receptor Reduces Blood Pressure and Increases Cardiac Performance.  
334 Journal of Pharmacology and Experimental Therapeutics **335**, 572-579,  
335 (2010).
- 336 11 Wisler, J. W. *et al.* A unique mechanism of beta-blocker action: carvedilol  
337 stimulates beta-arrestin signaling. Proc Natl Acad Sci U S A **104**, 16657-  
338 16662, (2007).
- 339 12 Kobilka, B. K. & Deupi, X. Conformational complexity of G-protein-coupled  
340 receptors. Trends Pharmacol Sci **28**, 397-406, (2007).
- 341 13 Manglik, A. *et al.* Structural Insights into the Dynamic Process of beta2-  
342 Adrenergic Receptor Signaling. Cell **161**, 1101-1111, (2015).
- 343 14 Nygaard, R. *et al.* The dynamic process of beta(2)-adrenergic receptor  
344 activation. Cell **152**, 532-542, (2013).
- 345 15 Ghanouni, P. *et al.* Functionally different agonists induce distinct  
346 conformations in the G protein coupling domain of the beta 2 adrenergic  
347 receptor. J Biol Chem **276**, 24433-24436, (2001).
- 348 16 Wingler, L. M. *et al.* Angiotensin Analogs with Divergent Bias Stabilize  
349 Distinct Receptor Conformations. Cell **176**, 468-+, (2019).
- 350 17 Warne, T. *et al.* The structural basis for agonist and partial agonist action on a  
351 beta(1)-adrenergic receptor. Nature **469**, 241-244, (2011).
- 352 18 Rosenbaum, D. M. *et al.* Structure and function of an irreversible agonist-  
353 beta(2) adrenoceptor complex. Nature **469**, 236-240, (2011).
- 354 19 Cherezov, V. *et al.* High-resolution crystal structure of an engineered human  
355 beta2-adrenergic G protein-coupled receptor. Science **318**, 1258-1265, (2007).
- 356 20 Masureel, M. *et al.* Structural insights into binding specificity, efficacy and  
357 bias of a beta2AR partial agonist. Nat Chem Biol **14**, 1059-1066, (2018).
- 358 21 Warne, T., Edwards, P. C., Dore, A. S., Leslie, A. G. W. & Tate, C. G.  
359 Molecular basis for high-affinity agonist binding in GPCRs. Science **364**, 775-  
360 778, (2019).
- 361 22 Ring, A. M. *et al.* Adrenaline-activated structure of beta2-adrenoceptor  
362 stabilized by an engineered nanobody. Nature **502**, 575-579, (2013).
- 363 23 Warne, T., Edwards, P. C., Leslie, A. G. & Tate, C. G. Crystal structures of a  
364 stabilized beta1-adrenoceptor bound to the biased agonists bucindolol and  
365 carvedilol. Structure **20**, 841-849, (2012).

10<sup>th</sup> December 2019

- 366 24 Staus, D. P. *et al.* Sortase ligation enables homogeneous GPCR  
367 phosphorylation to reveal diversity in beta-arrestin coupling. *Proc Natl Acad*  
368 *Sci U S A* **115**, 3834-3839, (2018).
- 369 25 Shukla, A. K. *et al.* Structure of active beta-arrestin-1 bound to a G-protein-  
370 coupled receptor phosphopeptide. *Nature* **497**, 137-141, (2013).
- 371 26 Sommer, M. E., Hofmann, K. P. & Heck, M. Distinct loops in arrestin  
372 differentially regulate ligand binding within the GPCR opsin. *Nat Commun* **3**,  
373 995, (2012).
- 374 27 Lally, C. C., Bauer, B., Selent, J. & Sommer, M. E. C-edge loops of arrestin  
375 function as a membrane anchor. *Nat Commun* **8**, 14258, (2017).
- 376 28 Pandy-Szekeres, G. *et al.* GPCRdb in 2018: adding GPCR structure models  
377 and ligands. *Nucleic Acids Res* **46**, D440-D446, (2018).
- 378 29 Kumari, P. *et al.* Functional competence of a partially engaged GPCR-beta-  
379 arrestin complex. *Nat Commun* **7**, 13416, (2016).
- 380 30 Sommer, M. E., Smith, W. C. & Farrens, D. L. Dynamics of arrestin-  
381 rhodopsin interactions: acidic phospholipids enable binding of arrestin to  
382 purified rhodopsin in detergent. *J Biol Chem* **281**, 9407-9417, (2006).
- 383 31 Yen, H. Y. *et al.* PtdIns(4,5)P<sub>2</sub> stabilizes active states of GPCRs and enhances  
384 selectivity of G-protein coupling. *Nature* **559**, 423-427, (2018).
- 385 32 Borroto-Escuela, D. O. & Fuxe, K. Oligomeric Receptor Complexes and Their  
386 Allosteric Receptor-Receptor Interactions in the Plasma Membrane Represent  
387 a New Biological Principle for Integration of Signals in the CNS. *Front Mol*  
388 *Neurosci* **12**, 230, (2019).
- 389 33 Garcia-Nafria, J., Lee, Y., Bai, X., Carpenter, B. & Tate, C. G. Cryo-EM  
390 structure of the adenosine A<sub>2A</sub> receptor coupled to an engineered  
391 heterotrimeric G protein. *Elife* **7**, (2018).
- 392 34 Nivedha, A. K. *et al.* Identifying Functional Hotspot Residues for Biased  
393 Ligand Design in G-Protein-Coupled Receptors. *Mol Pharmacol* **93**, 288-296,  
394 (2018).
- 395 35 DeVree, B. T. *et al.* Allosteric coupling from G protein to the agonist-binding  
396 pocket in GPCRs. *Nature* **535**, 182-186, (2016).
- 397 36 Oswald, C. *et al.* Intracellular allosteric antagonism of the CCR9 receptor.  
398 *Nature* **540**, 462-465, (2016).

10<sup>th</sup> December 2019

399 37 Jazayeri, A. *et al.* Extra-helical binding site of a glucagon receptor antagonist.  
400 Nature **533**, 274-277, (2016).

401

402

403

404 **Fig. 1 | Overall cryo-EM reconstruction of the  $\beta_1$ AR-  $\beta$ arr1 complex.** **a**, The  
405 density of the cryo-EM map (sharpened with a  $B$  factor of  $-80 \text{ e}/\text{\AA}^2$ ) is coloured  
406 according to polypeptides ( $\beta_1$ AR, blue;  $\beta$ arr1, green) and overlaid on density of the  
407 nanodisc (grey).  $F_{ab30}$  has been omitted from the structure for clarity (see Extended  
408 Data Fig 2). **b**, The orthosteric binding pocket of  $\beta_1$ AR (pale blue) with formoterol  
409 (sticks: yellow, carbon) and its density in the cryo-EM map (grey mesh). **c**, The finger  
410 loop of  $\beta$ arr1 with side chains shown as sticks (light green, carbon) and its density in  
411 the cryo-EM map (grey mesh). Helix 8 of  $\beta_1$ AR has been removed for clarity. Maps  
412 were contoured at 0.02 ( $2 \text{ \AA}$  carve radius in panels **b** and **c**) and visualised in Chimera.  
413 **d**, Crystal structure of the  $\beta_1$ AR-Nb80 complex:  $\beta_1$ AR, rainbow colouration; Nb80,  
414 grey; formoterol, magenta spheres (carbon); water molecules, red spheres; purple  
415 sphere,  $\text{Na}^+$  ion; detergent Hega-10, grey sticks (carbon). The inset shows an omit  
416 map of formoterol in the  $\beta_1$ AR-Nb80 complex contoured at  $1 \sigma$  (blue mesh).

417

418 **Fig. 2 | Structure of  $\beta$ arr1 in complex with  $\beta_1$ AR.** **a**,  $\beta$ arr1 (pale green) coupled to  
419  $\beta_1$ AR (surface representation) was aligned with the structures of S-arrestin (pale  
420 brown) coupled to rhodopsin (PDB 5W0P) and the structure of active  $\beta$ arr1 (mauve)  
421 bound to the phosphopeptide  $V_2$ Rpp and  $F_{ab30}$  (PDB 4JQI). The phosphopeptide  
422 shown (carbon, magenta) is  $V_2$ R<sub>6P</sub> linked to  $\beta_1$ AR. Full alignments of the  
423 phosphopeptides are shown in Extended Data Fig. 6b. **b-e**, details of coupled arrestin  
424 finger loops and G protein  $\alpha_5$  helices after alignment of the following receptors (PDB

10<sup>th</sup> December 2019

425 code in parentheses) using GESAMT (ccp4 program suite): S-arrestin coupled to  
426 rhodopsin (5W0P, pale brown); transducin (G<sub>t</sub>) coupled to rhodopsin (6OYA, pale  
427 pink);  $\beta$ arr1 coupled to  $\beta_1$ AR (pale green); Nb80 coupled to  $\beta_1$ AR (6IBL, grey); G<sub>s</sub>  
428 coupled to  $\beta_2$ AR (3SN6, blue).

429

430 **Fig. 3 | Comparison of the receptor coupling interfaces in the complexes of**  
431  **$\beta_1$ AR- $\beta$ arr1 and  $\beta_2$ AR-G<sub>s</sub>.** **a**, snake plot of the intracellular region of turkey  $\beta_1$ AR  
432 with amino acid residues colour coded according to interactions: red, contact between  
433  $\beta_1$ AR and  $\beta$ arr1; blue, contact between  $\beta_2$ AR and G<sub>s</sub>; purple, both of the previously  
434 mentioned contacts. **b**, detail of the interface between the  $\beta$ arr1 finger loop (pale  
435 green) and  $\beta_1$ AR (pale blue). **c**, detail of the interface between the  $\alpha 5$  helix of the G<sub>s</sub>  
436  $\alpha$ -subunit (blue) and  $\beta_2$ AR (green). In panels **b** and **c**, depicted are polar interactions  
437 (red dashes), Van der Waals interactions (blue dashes; atoms  $\leq 3.9$  Å apart) and  
438 Arg<sup>3.50</sup> (sticks; carbon, grey). **d-e**, cross-sections through the intracellular halves of  
439  $\beta_1$ AR and  $\beta_2$ AR to highlight the different shapes of the intracellular cleft formed upon  
440 coupling of  $\beta$ arr1 compared to G<sub>s</sub>. Transmembrane helices are shown for orientation  
441 and they are in front of the cross-section.

442

443 **Fig. 4 | Differences between formoterol-bound  $\beta_1$ AR coupled to either  $\beta$ arr1 or**  
444 **Nb80.** **a-c**, superposition of  $\beta_1$ AR coupled to  $\beta$ arr1 (blue cartoon) and  $\beta_1$ AR coupled  
445 to Nb80 (grey cartoon) with residues interacting with the ligand shown as sticks.  
446 Residues labelled in orange interact with formoterol but not isoprenaline. **d**, structures  
447 of arrestin biased ligands (formoterol, carmoterol, carvedilol) and a balanced agonist  
448 (isoprenaline). Regions in blue are identical to adrenaline and the red region in

10<sup>th</sup> December 2019

449 carvedilol is the oxypropylene linker typical of  $\beta$ -adrenoceptor antagonists of the G

450 protein pathway.

451

452

10<sup>th</sup> December 2019

## 453 **Materials and Methods**

454 **Cloning, expression and purification of  $\beta_1$ AR.** The turkey (*Meleagris*  
455 *gallopavo*)  $\beta_1$ AR constructs used for crystallization (see Extended Data Fig. 10) of the  
456  $\beta_1$ AR-Nb80 complex (trx- $\beta_1$ AR) was based on  $\beta_{44}$ -m23<sup>17</sup>. The construction of trx-  
457  $\beta_1$ AR has been described previously<sup>21</sup>. Relative to wild-type  $\beta_1$ AR, trx- $\beta_1$ AR contains  
458 truncations at the N- and C-termini (upstream of A33 and downstream of L367,  
459 respectively), and in intracellular loop 3 (C244 to R271, inclusive). Thioredoxin (*E.*  
460 *coli* trxA, with mutations C32S & C35S) was attached to the N-terminus via the linker  
461 EAAAK. trx- $\beta_1$ AR also contains the four thermostabilising mutations (R68S<sup>1.59</sup>,  
462 M90V<sup>2.53</sup>, F327A<sup>7.37</sup> and F338M<sup>7.48</sup>), as well as two additional mutations C116L<sup>3.27</sup>  
463 and C358A<sup>8.59</sup>. A hexahistidine tag is fused to the C-terminus of trx- $\beta_1$ AR.

464 The turkey  $\beta_1$ AR construct used for electron cryo-microscopy of the  $\beta_1$ AR-  
465  $\beta$ arr1-F<sub>ab</sub>30 complex ( $\beta$ 83S) was also based on  $\beta_{44}$ -m23<sup>17</sup>.  $\beta$ 83S (see Extended Data  
466 Fig. 10) shares the same truncations at the N-terminus and in intracellular loop 3 as  
467 trx- $\beta_1$ AR.  $\beta$ 83S contains six thermostabilising mutations (M44C<sup>1.35</sup>, M90V<sup>2.53</sup>,  
468 V103C<sup>2.66</sup>, D322K<sup>7.32</sup>, F327A<sup>7.37</sup> and F338M<sup>7.48</sup>), as well as three additional mutations  
469 C116L<sup>3.27</sup>, E130W<sup>3.41</sup> and C358A<sup>8.59</sup>. The sequence downstream of C358A<sup>8.59</sup> has  
470 been replaced with a linker sequence mimicking the C-terminal tail of vasopressin  
471 receptor 2 (V<sub>2</sub>R). The sequence contains a sortase recognition site (LPETG) followed  
472 by a heptahistidine tag [ARGRPLPETGGRRHHHHHHH]. The sortase site is  
473 positioned in order to maintain the relative distance between H8 in V<sub>2</sub>R and the  
474 conserved phosphoserine triad motif following sortase assembly (Extended Data Fig.  
475 4).  $\beta$ 84S is identical to  $\beta$ 83S except for an N-terminal MBP domain fusion  
476 constructed with a flexible linker.

477



10<sup>th</sup> December 2019

478           The generation of  $\text{trx-}\beta_1\text{AR}$  baculovirus and its expression and subsequent  
479 purification was performed as described previously<sup>21</sup>. It was solubilized and purified  
480 in decylmaltoside (DM, Generon) and eluted off the alprenolol sepharose ligand  
481 affinity column as described previously<sup>17,38,39</sup> with 100  $\mu\text{M}$  formoterol. The  $\beta 83\text{S}$   
482 construct was cloned into the baculovirus transfer vector pBacPAK8 (Clontech).  
483 Baculovirus expressing  $\beta 83\text{S}$  was prepared using the flashBAC ULTRA system  
484 (Oxford Expression Technologies Ltd).  $\beta 83\text{S}$  was expressed in *Trichoplusia ni* cells  
485 (Expressions Systems). Cells were grown in suspension in ESF 921 medium  
486 (Expressions Systems) to a density of  $3 \times 10^6$  cells/ml. Cultures were supplemented  
487 with 5% BSA prior to infection with  $\beta 83\text{S}$  baculovirus and incubated for 40 h.

488            $\beta 83\text{S}$  was solubilized in 2% dodecylmaltoside (DDM, Generon) from the  
489 membrane fraction and further purified in 0.02% DDM by  $\text{Ni}^{2+}$ -affinity  
490 chromatography and alprenolol sepharose ligand affinity chromatography. It was  
491 eluted from the alprenolol sepharose column with 100  $\mu\text{M}$  alprenolol.  $\beta 83\text{S}$  was  
492 further polished on a Superdex 200 Increase column to remove excess alprenolol.  
493  $\beta 83_{6\text{P}}$  was generated by sortase A-mediated covalent assembly<sup>40</sup> of purified  $\beta 83\text{S}$  with  
494 a synthetic phosphopeptide,  $\text{V}_2\text{R}_{6\text{P}}$  (GGGDE[pS]A[pT][pT]A[pS][pS][pS]LAKDTSS,  
495 Tufts University Core Facility). The expression plasmid for sortase A(P94S, D160N,  
496 D165A, K196T) was a gift from S. Eustermann and D. Neuhaus.  $\beta 83\text{S}$  (1 mg/ml) was  
497 incubated overnight on ice with 10-fold molar excess of  $\text{V}_2\text{R}_{6\text{P}}$  and His-tagged sortase  
498 A at 1:10 (mol/mol) enzyme:receptor ratio. The assembly mixture was pre-adjusted  
499 with NaOH to pH 7.5 prior to the addition of receptor. Unreacted receptor and  
500 enzyme were removed by negative  $\text{Ni}^{2+}$ -affinity chromatography.  $\beta 83_{6\text{P}}$  was further  
501 polished on a Superdex 200 Increase column.

502

10<sup>th</sup> December 2019

503 **Expression and purification of nanobody Nb80.** A synthetic gene (Integrated DNA  
504 Technologies) for Nb80<sup>6</sup> was cloned into plasmid pET-26b(+) (Novagen) with a N-  
505 terminal His<sub>6</sub> tag followed by a thrombin protease cleavage site. Expression in *E. coli*  
506 strain BL21(DE3)RIL (Agilent Technologies) and purification from the periplasmic  
507 fraction was as described elsewhere<sup>22</sup>, but with removal of the His<sub>6</sub> tag was by a  
508 thrombin (Sigma) protease cleavage step before concentration to 40 mg/ml.

509

510 **Formation of formoterol-bound trx-β<sub>1</sub>AR-nanobody complex and purification**  
511 **with detergent exchange by size exclusion chromatography.** Preparation of  
512 receptor-nanobody complex was performed as described previously<sup>21</sup>. Formoterol-  
513 bound trx-β<sub>1</sub>AR (1.5 mg) was mixed with 1.5-fold molar excess nanobody (0.65 mg),  
514 cholesteryl hemisuccinate (Sigma) was added to 0.1 mg/ml in a final volume of 150  
515 μL, and then incubated for 2 h at room temperature.

516 After incubation, size exclusion chromatography (SEC) was performed to  
517 separate receptor-nanobody complex from excess nanobody and to exchange the  
518 detergent from DM to HEGA-10 (Anatrace) for crystallization by vapour diffusion. A  
519 Superdex 200 10/300 GL Increase column (GE Healthcare) was used at 4 °C, the  
520 column was equilibrated with SEC buffer (10 mM Tris-Cl<sup>-</sup> pH 7.4, 100 mM NaCl, 0.1  
521 mM EDTA, 0.35% HEGA-10) supplemented with 10 μM formoterol. Samples  
522 containing complex were mixed with 200 μl SEC buffer and centrifuged (14,000 x g,  
523 5 minutes) immediately prior to SEC (flow rate 0.2 ml/minute), with a run time of one  
524 hour which was sufficient for a near-complete detergent exchange as indicated by  
525 quantitation of residual glycosidic detergent<sup>41</sup>. Peak fractions corresponding to  
526 complex were concentrated to 15 mg/ml for crystallization by vapour diffusion using  
527 Amicon Ultra-4 50 kDa centrifugal filter units (EMD-Millipore).

10<sup>th</sup> December 2019

528

529 **Crystallization of receptor-nanobody complex, data collection, processing and**  
530 **refinement.** Crystals were grown in 150 + 150 nl sitting drops by vapour diffusion at  
531 18 °C against reservoir solutions containing 0.1 M HEPES-Na<sup>+</sup> pH 7.5 and 21-24%  
532 PEG1500. Crystals usually appeared within 2 h and grew to full size (up to 200 µm in  
533 length) within 48 h. Crystallization plates were equilibrated to 4 °C for at least 24  
534 hours before cryo-cooling. Crystals were picked with LithoLoops (Molecular  
535 Dimensions Ltd) and dipped in 0.1 M HEPES-Na<sup>+</sup> pH 7.5, 25% PEG1500, 5%  
536 glycerol before plunging into liquid nitrogen.

537 Diffraction data for the  $\text{trx-}\beta_1\text{AR-Nb80}$  complex with formoterol bound were  
538 collected at ESRF, Grenoble using the autonomous beamline MASSIF-1<sup>42</sup>. X-ray  
539 diffraction data were collected from a single point on the crystal using automatic  
540 protocols for the location and optimal centring of crystals<sup>43</sup>. The beam diameter was  
541 selected automatically to match the crystal volume of highest homogeneous quality  
542 and was therefore collimated to 30 µm, and strategy calculations accounted for flux  
543 and crystal volume in the parameter prediction for complete data sets<sup>44</sup>. Diffraction  
544 data were processed using MOSFLM<sup>45</sup> and AIMLESS<sup>46</sup>, the structure was solved  
545 using PHASER<sup>47</sup> with use of the crystal structures of the active state  $\beta_2\text{AR}$  stabilized  
546 with nanobody Nb80<sup>6</sup> and wild-type thioredoxin (PDB codes 3P0G, 2H6X) as search  
547 models. Diffraction was anisotropic, as indicated by the estimated resolution limits  
548 ( $\text{CC}_{1/2}=0.3$ ) in h,k,l directions (Extended Data Table 2). In order to retain statistically  
549 significant diffraction data, but eliminating reflections in less well diffracting  
550 directions, the data were truncated anisotropically using the UCLA Diffraction  
551 Anisotropy Server (<http://services.mbi.ucla.edu/anisoscale/>). Model refinement and  
552 rebuilding were carried out with REFMAC5<sup>48</sup> and COOT<sup>49</sup>.

10<sup>th</sup> December 2019

553

554 **Cloning, expression and purification of human  $\beta$ -arrestin-1.** Wild-type human  
555  $\beta$ arr1 was cloned into the pTrcHisB vector with a TEV protease-cleavable N-terminal  
556 His<sub>6</sub> and FLAG tag. Two mutations were introduced by site-directed mutagenesis:  
557 L68C, a finger loop-mutation commonly used in the functional labelling of arrestins<sup>29</sup>,  
558 and R169E, which disrupts the polar core and predisposes arrestin to activation<sup>50</sup>.  
559 Arrestin was expressed in BL21 cells. Cells were grown in LB medium supplemented  
560 with 100  $\mu$ g/ml ampicillin at 25 °C. Expression was induced with 30  $\mu$ M IPTG at a  
561 cell density of OD<sub>600</sub> 0.5. The temperature was lowered to 15 °C and the cells allowed  
562 to grow for an additional 20 h. Cells were harvested and flash frozen in liquid  
563 nitrogen and stored at -80 °C. Arrestin was purified sequentially by Ni<sup>2+</sup>-affinity  
564 chromatography, TEV protease-cleavage of its N-terminal affinity tags, and Heparin  
565 chromatography, eluting off the Heparin column using 1 M NaCl. Purified arrestin  
566 was further polished on a Superdex 200 prep grade column (GE Healthcare)  
567 equilibrated in 20 mM Tris-Cl<sup>-</sup> pH 8.0, 0.1 M NaCl, 10% glycerol, 0.5 mM DTT.  
568 Peak fractions were pooled and concentrated to 20 mg/ml and flash frozen as aliquots  
569 in liquid nitrogen and stored at -80 °C.

570

571 **Expression and purification of zebra fish apo-lipoprotein A-1.** Zebra fish apo-  
572 lipoprotein A-1 (zap1) was expressed and purified as previously described<sup>51</sup>. Briefly,  
573 a pET-28a vector harbouring zap1 with a HRV-3C protease-cleavage N-terminal His<sub>6</sub>  
574 tag was transformed into *E. coli* BL21(DE3)RIL cells. Cells were grown at 37°C in  
575 TB medium supplemented with kanamycin. Expression was induced at OD<sub>600</sub> 1-1.5  
576 with 1 mM IPTG. The temperature was lowered to 25°C and the culture was allowed  
577 to grow for 3 h. Cells were lysed by sonication in the presence of 1% (v/v) Triton X-

10<sup>th</sup> December 2019

578 100. Cell lysate was clarified by centrifugation and passage through a 0.22µm filter  
579 prior to loading onto a HisTrap-FF column. The pellet from the previous  
580 centrifugation step was resuspended in buffer containing 6 M guanidine hydrochloride  
581 (GnHCl), clarified by centrifugation, and loaded onto the HisTrap column. The  
582 column was washed in successive buffers (base: 20 mM Tris-Cl<sup>-</sup> pH 7.5, 0.3 M NaCl,  
583 20 mM imidazole) containing first, 6 M GnHCl, then 0.2% Triton X-100, followed by  
584 50 mM Na-cholate, before eluting in 20 mM Tris-Cl<sup>-</sup> pH 7.5, 150 mM NaCl, 20 mM  
585 Na-cholate, 0.3 M imidazole. Purified zap1 was treated with HRV-3C protease in the  
586 presence of 0.5 mM TCEP to remove the His<sub>6</sub> tag prior to polishing on a Superdex  
587 200 Increase column equilibrated in 20 mM Tris-Cl<sup>-</sup> pH 7.5, 150 mM NaCl, 20 mM  
588 Na-cholate.

589

590 **Expression and purification of F<sub>ab30</sub>.** The coding region of F<sub>ab30</sub> was synthesized  
591 by GenScript based on previously published crystal structure (PDB 4JQI). For large-  
592 scale purification, F<sub>ab30</sub> was expressed in the periplasmic fraction of *E. coli* 55244  
593 cells (ATCC) and purified using Protein L (GE Healthcare) gravity flow affinity  
594 chromatography as published previously<sup>29</sup>. Briefly, Cells harboring F<sub>ab30</sub> plasmid  
595 were used to inoculate 2xYT and grown overnight at 30 °C. Fresh 2xYT was  
596 inoculated with 5% initial inoculum and grown for an additional 8 h at 30°C. Cells  
597 were harvested and resuspended in an equal volume of CRAP medium supplemented  
598 with ampicillin, and grown for 16 h at 30 °C.

599 For F<sub>ab30</sub> purification, cells were lysed in Fab-lysis buffer (50 mM HEPES-  
600 Na<sup>+</sup> pH 8.0, 0.5 M NaCl, 0.5% (v/v) Triton X-100, 0.5 mM MgCl<sub>2</sub>) by sonication.  
601 Crude cell lysate was heated in a 65°C water bath for 30 min and chilled immediately  
602 on ice for 5 min. Subsequently, lysate was clarified by centrifugation at 20,000 x g

10<sup>th</sup> December 2019

603 and passaged through pre-equilibrated Protein L resin packed gravity flow affinity  
604 column. After binding at room temperature, beads were washed extensively with  
605 wash buffer (50 mM HEPES-Na<sup>+</sup> pH 8.0, 0.5 M NaCl). Protein was eluted with 100  
606 mM acetic acid into tubes containing 10% vol. neutralization buffer (1 M HEPES pH  
607 8.0). Following elution, sample was desalted into Fab-storage buffer (20 mM HEPES  
608 pH 8.0, 0.1 M NaCl) using a pre-packed PD-10 column (GE Healthcare). Purified  
609 F<sub>ab</sub>30 was flash frozen stored in buffer supplemented with 10% glycerol.

610

611 **Functional validation of purified F<sub>ab</sub>30.** Functionality of purified F<sub>ab</sub>30 was  
612 assessed using co-immunoprecipitation with their reactivity towards V<sub>2</sub>Rpp-bound  
613 βarr1 as readout following a previously published protocol<sup>52</sup>. Briefly, F<sub>ab</sub>30 (1.5 μg)  
614 was incubated with purified βarr1 (2.5 μg) in the presence or absence of V<sub>2</sub>Rpp (pre-  
615 incubated with 5-10 fold molar excess compared to βarr1) in 100-200μl reaction  
616 volume. After 1h incubation at room temperature, pre-equilibrated Protein L beads  
617 were added to the reaction mixture and incubated for an additional 1 h. Subsequently,  
618 Protein L beads were washed 3-5 times using 20 mM HEPES-Na<sup>+</sup> pH 7.4, 150 mM  
619 NaCl, 0.01% MNG to remove any non-specific binding. Bound proteins were eluted  
620 using 2×SDS loading buffer and separated by SDS-PAGE. Interaction of F<sub>ab</sub>30 with  
621 activated βarr1 was visualized using Coomassie-staining and Western blot.

622

623 **Reconstitution of purified β<sub>1</sub>AR into nanodiscs and complex formation.**

624 Reconstitution was performed by adapting established protocols<sup>53</sup>. Stocks of 16:0-  
625 18:1 PC (POPC) and 16:0-18:1 PG (POPG, Avanti Polar Lipids) in chloroform were  
626 dried down under a nitrogen stream and fully solubilised in 20 mM HEPES-Na<sup>+</sup>, 150  
627 mM NaCl, 100 mM Na-cholate to make 50 mM lipid stocks. β83<sub>6P</sub> (500 μg) was

10<sup>th</sup> December 2019

628 reconstituted into zap1-supported nanodiscs containing 7:3 (mol/mol) POPC:POPG.  
629 Receptor, zap1 and lipids at a molar ratio of 1:10:1000 (net. 18 mM cholate) were  
630 mixed and incubated for an hour on ice. A three-fold excess of damp, pre-equilibrated  
631 Bio-Beads SM-2 (Bio-Rad) was added in batch and the sample was mixed end-over-  
632 end overnight at 4 °C. An absorption capacity of 80 mg cholate/g was used to  
633 calculate the requisite amount of polystyrene beads<sup>54</sup>. The reconstituted sample,  
634 composed of a mixture of  $\beta$ 83<sub>6P</sub>-incorporated nanodiscs and zap1/lipid-only  
635 nanodiscs, was further polished on a Superdex 200 Increase column equilibrated in 20  
636 mM HEPES-Na<sup>+</sup>, 150 mM NaCl, 5  $\mu$ M formoterol.

637 The nanodisc mixture was supplemented with a further 10  $\mu$ M formoterol and  
638 incubated with a 2-fold excess of  $\beta$ arr1(L68C, R169E) for 1 h on ice. A 2-fold excess  
639 of His-tagged F<sub>ab</sub>30 was added and the mixture incubated for 1 h. Subsequently, the  
640 mixture was left to incubate in batch with 1 mL Ni-NTA resin (QIAGEN) overnight  
641 at 4°C. A pull-down of  $\beta$ 83<sub>6P</sub>- $\beta$ arr1-F<sub>ab</sub>30 complex in nanodisc was performed by  
642 Ni<sup>2+</sup>-chromatography exploiting His-tagged F<sub>ab</sub>30 to remove tag-free zap1/lipid-only  
643 nanodiscs. The nanodisc-embedded ternary complex was separated from excess F<sub>ab</sub>30  
644 on a Superdex 200 Increase column equilibrated in 10 mM HEPES-Na<sup>+</sup> pH 7.5, 20  
645 mM NaCl, 2  $\mu$ M formoterol. SEC fractions were either used immediately for cryo-  
646 EM grid preparation or divided into aliquots and flash frozen and stored at -80°C.  
647 Grids prepared with freshly isolated complex or samples that had been subjected to a  
648 freeze/thaw cycle were identical in apparent quality.

649

650  **$\beta$ <sub>1</sub>AR- $\beta$ -arrestin1-F<sub>ab</sub>30 cryo-grid preparation and data collection.** Cryo-EM  
651 grids were prepared by applying 3  $\mu$ L sample (at a protein concentration of 1 mg/ml)  
652 on glow-discharged holey gold grids (Quantifoil Au 1.2/1.3 300 mesh). Excess

10<sup>th</sup> December 2019

653 sample was removed by blotting with filter paper for 2-3 s before plunge-freezing in  
654 liquid ethane (cooled to -181 °C) using a FEI Vitrobot Mark IV maintained at 100%  
655 relative humidity and 4 °C. Data collection was carried out on grids made from a  
656 single preparation of  $\beta_1$ AR- $\beta$ arr1-F<sub>ab</sub>30 complex. Images were collected on a FEI  
657 Titan Krios microscope at 300 kV using a GIF Quantum K2 (Gatan) in counting  
658 mode. Data were collected in 3 independent sessions—two on LMB-Krios2; one on  
659 Diamond eBIC-Krios1—to give a total of 18,581 movies. When processing previous  
660 datasets, particles were assessed by cryoEF<sup>55</sup> to have an orientation distribution  
661 efficiency,  $E_{od} \sim 0.55$ , indicating moderately severe preferential orientation of the  
662 particles in freestanding ice. In order to improve orientation distribution, micrographs  
663 in this study were collected with a 30°-stage tilt. On LMB-Krios2, automated data  
664 acquisition was performed using serialEM<sup>56</sup>. Grid squares were subdivided into 3x3  
665 grid hole-matrices. Stage shift was used to align the central grid hole within the  
666 acquisition template. Subsequently, image shift with active beam-tilt compensation  
667 was used to record from the nine holes. Large changes in sample height due to stage-  
668 tilt were compensated for by an equivalent degree of defocus adjustment, pre-  
669 determined and applied so as to normalise to the target defocus value. On eBIC-  
670 Krios1, data collection was performed using EPU (Thermo Fisher Scientific). Stage  
671 shift was used to centre individual grid holes. In all sessions, two non-overlapping  
672 exposures, aligned along the tilt axis, were collected per grid hole. Micrographs were  
673 collected with a total accumulated dose of  $\sim 45\text{-}50 \text{ e}^-/\text{\AA}^2$ . Each micrograph was  
674 collected as dose-fractionated movie frames ( $\sim 1.0 \text{ e}^-/\text{\AA}^2/\text{frame}$ ) at a dose rate of  $4.5 \text{ e}^-$   
675  $/\text{pix}/\text{sec}$  (LMB) or  $3.3 \text{ e}^-/\text{pix}/\text{sec}$  (eBIC) with an energy selection slit width of 20 eV.  
676 The datasets were collected at a magnification of  $105,000\times$  ( $1.1 \text{ \AA}/\text{pix}$ , LMB) and  
677  $130,000\times$  ( $1.047 \text{ \AA}/\text{pix}$ , eBIC).



10<sup>th</sup> December 2019

678

679 **Data processing and model building.** RELION-3.0.7 was used for all data  
680 processing unless otherwise specified<sup>57</sup>. Drift, beam-induced motion and dose-  
681 weighting were corrected in Warp-1.0.6 using a spatial resolution of 5×5 and a  
682 temporal resolution equal to the number of movie frames<sup>58</sup>. CTF estimation and  
683 determination of the focus gradient was performed in Warp using movie frame input,  
684 with 5×5 spatial resolution and a temporal resolution of 1. Micrographs were curated  
685 for quality based on ice contamination, CTF fitting quality, estimated resolution, and  
686 astigmatism, resulting in a trimmed dataset of 18,101 micrographs. Auto-picking was  
687 performed with a Gaussian blob as a template, which resulted in optimal particle  
688 picking. The CTF parameters for the picked coordinates were interpolated from the  
689 focus gradients modelled in Warp. Particles were extracted in a box-size equivalent to  
690 264 Å and downsampled initially to 4.4 Å/pix. For each LMB-Krios2 session,  
691 micrographs were further separated into two halves, generating a total of five groups  
692 of particle stacks. Each group was processed independently. For each group, particles  
693 were subjected to two rounds of 3D classification in 6 classes using an *ab initio* model  
694 as reference. In the second round of 3D classification, particle distribution appeared to  
695 be dictated in part by the size of the nanodisc component (Extended Data Fig. 3).  
696 Aberrant classes of particles, such as C4 and C5 (Extended Data Fig. 3) were  
697 excluded from subsequent rounds of processing, as they probably arose from distorted  
698 nanodiscs (C4) or aggregation effects (C5) that arose during grid preparation.  
699 Particles of varying nanodisc sizes were combined, re-extracted with downscaling to  
700 1.69 Å/pix, and refined to achieve an overall consensus alignment. Clear density  
701 could be observed for the transmembrane helices as well as two protrusions from the  
702 lipid boundary corresponding to ECL2 and ICL3, demarcating the volumes

10<sup>th</sup> December 2019

703 corresponding to receptor and zap1/lipid. Particles were subjected to Bayesian  
704 polishing before further refinement. Correcting for per-particle beam-induced motion  
705 consistently improved resolution by two resolution shells (according to a gold-  
706 standard FSC of 0.143). Signal subtraction was performed to remove most of the non-  
707 receptor component of the nanodisc, facilitating refinement of the  $\beta_1$ AR- $\beta$ arr1-F<sub>ab</sub>30  
708 complex that included a thin annular layer of lipid. Subsequently, 3D classification  
709 without alignment into 6 classes (regularisation parameter,  $T=20$ ) identified a subset  
710 of particles (~8%) that refined to high resolution and showed fine map details in the  
711 receptor and arrestin regions. On trace-back, this subset of good particles constituted  
712 roughly an equal proportion of the class averages identified in the preceding round of  
713 3D classification (*i.e.* class distributions based loosely on nanodisc morphology). At  
714 this stage, the good particles from the five groups were combined, re-extracted with  
715 downscaling of 1.1 Å/pix, and processed as a single dataset. The merged particle set  
716 was split according to microscope session for independent Bayesian polishing before  
717 re-merging for downstream processing. Following signal subtraction of the nanodisc  
718 and refinement, the model reached a resolution of 3.43 Å. Subsequently, refined  
719 particles were imported into and processed in RELION-3.1. On account of the image  
720 shift collection strategy used in LMB-Krios2, the particles from those two sessions  
721 were assigned to 1 of 18 optical groups—by sessions and based on position within  
722 their respective 3×3 matrices. Including the eBIC-Krios1 particles, this produced 19  
723 optical group assignments, which were corrected independently for residual beam-tilt,  
724 anisotropic magnification, per-micrograph astigmatism, and per-particle CTF  
725 estimation. In the final refinement sequence, half maps were locally filtered between  
726 refinement iterations using SIDESPLITTER (K. Ramlaul, C.M. Palmer & C.H.S.  
727 Aylett, manuscript in preparation), an adaption of the LAFTER algorithm (Ramlaul *et*

10<sup>th</sup> December 2019

728 *al.* 2019) that maintains gold-standard separation between the two half maps. The  
729 final model contained 403,991 particles and reached an overall resolution of 3.3 Å  
730 with side chains visible for most of the complex (Extended Data Figs. 2 and 4). Local  
731 resolution estimates were calculated with RELION-3.1 showing the  $\beta_1$ AR- $\beta$ arr1 and  
732  $\beta$ arr1-F<sub>ab</sub>30 interfaces at ~3.2 Å and rising gradually to ~3.7 Å at the level of the  
733  $\beta_1$ AR orthosteric binding site; H1 and the extracellular regions of the receptor, the C-  
734 distal end of arrestin, and CL-CH1 domains of F<sub>ab</sub>30 are at poorer resolution, with the  
735 worst regions reaching ~4.5 Å at the most exposed edges. The final particle set was  
736 assessed to have an orientation distribution efficiency,  $E_{od}$  ~0.72.

737 Model building and refinement was carried out using the CCP-EM<sup>59</sup> and  
738 PHENIX<sup>60</sup> software suites. The formoterol-bound  $\beta_1$ AR-Nb80 and  $\beta$ arr1-F<sub>ab</sub>30-  
739 V<sub>2</sub>Rpp crystal structures were used as starting models (PDB 6IBL and 4JQI).  $\beta_1$ AR  
740 was modelled from A42 to A358 with a gap from R243 to R279 (inclusive) on  
741 account of weak density. The V<sub>2</sub>R<sub>6P</sub> portion of  $\beta_1$ AR has been modelled from E372 to  
742 D384. The intervening linker region to A358 was too flexible to be resolved. Density  
743 for all phosphoresidues was well resolved.  $\beta$ arr1 was modelled from T6 to E359, with  
744 a gap between R331 and S340 (inclusive), which constitutes a region encompassing  
745 the C-distal “344-loop” that potentially interacts with the lipid head group region.  
746 Initial manual model building was performed in COOT<sup>49</sup> following a jelly-body  
747 refinement in REFMAC5<sup>48</sup>. Restraints for formoterol were generated using AM1  
748 optimisation in eLBOW<sup>61</sup>. In order to better maintain geometry in the regions of weak  
749 density, secondary structure restraints, Ramachandran restraints and rotamer restraints  
750 were applied during real space refinement in PHENIX. The model followed iterative  
751 cycles of manual modification in COOT and restrained refinement in PHENIX. The  
752 final model achieved good geometry (Extended Data Table 1) with validation of the

10<sup>th</sup> December 2019

753 model performed in PHENIX, Molprobit<sup>62</sup> and EMRinger<sup>63</sup>. The goodness of fit of  
754 the model to the map was carried out using PHENIX using a global model-vs-map  
755 FSC (Extended Data Fig. 4). Over fitting in refinement was monitored<sup>64</sup> using  
756  $FSC_{work}/FSC_{test}$  by refining a ‘shaken’ model against half map-1 and calculating a  
757 FSC of the resulting refined model against half map-2.

758

759 **Expression and purification of mini-G<sub>s</sub>.** Mini-G<sub>s</sub> (construct R393) was expressed  
760 in *E. coli* strain BL21(DE3)RIL and purified by Ni<sup>2+</sup>-affinity chromatography,  
761 removal of the His tag using TEV protease and negative purification on Ni<sup>2+</sup>-NTA for  
762 TEV and undigested mini-G<sub>s</sub> removal; and final SEC to remove aggregated protein<sup>65</sup>.  
763 Purified mini-G<sub>s</sub> was concentrated to a final concentration of 100 mg/ml in 10 mM  
764 HEPES-Na<sup>+</sup> pH 7.5, 100 mM NaCl, 10% v/v glycerol, 1 mM MgCl<sub>2</sub>, 1 μM GDP and  
765 0.1 mM TCEP.

766

767 **Radioligand binding studies on β<sub>1</sub>AR in nanodiscs.** Purified β84S was inserted into  
768 nanodiscs and ligated to the phosphorylated peptide as described for β83S. Zap1 with  
769 lipid only (no receptor) was used to determine background binding. Nanodiscs  
770 containing either empty nanodiscs, β84<sub>6P</sub>, or β84<sub>6P</sub> in the presence of βarr1 were  
771 prepared in the absence of ligands and then diluted into assay buffer for radioligand  
772 saturation binding studies as previously described for insect cell membranes<sup>21</sup>.

773

774 **Competition binding assays.** Nanodiscs containing β84<sub>6P</sub> were resuspended in 20  
775 mM HEPES-Na<sup>+</sup> pH 7.5, 50 mM NaCl, 2.5 mM MgCl<sub>2</sub>, 0.1% BSA. Aliquots were  
776 supplemented with mini-G<sub>s</sub> construct R393 or βarr1 (final concentration 25 μM),  
777 either formoterol or isoprenaline (8 points, with the final concentration between 1 pM

10<sup>th</sup> December 2019

778 and 100  $\mu$ M), and apyrase (final concentration 0.1 U/ml; only with mini-G<sub>s</sub>) to give a  
779 final volume of 120  $\mu$ L or 220  $\mu$ l. Samples were incubated at 20 °C for 1 h, before  
780 adding [<sup>3</sup>H]-DHA (Perkin Elmer) with concentrations of competing ligand in the  
781 range 1-2.5 x K<sub>D</sub>. Non-specific binding was determined by measuring binding in the  
782 presence of 100  $\mu$ M unlabelled ligand. Samples were incubated at 20 °C for 1-5 h,  
783 before filtering through 96-well Multiscreen HTS GF/B filter plates (Merck  
784 Millipore) pre-soaked in 0.1% (w/v) polyethyleneimine, separating bound from  
785 unbound [<sup>3</sup>H]-DHA. Filters were washed three times with 200  $\mu$ l chilled assay buffer,  
786 dried, and then punched into scintillation vials with 4 ml Ultima Gold scintillant  
787 (Perkin Elmer). Radioligand binding was quantified by scintillation counting with a  
788 Tri-Carb Liquid Scintillation Analyser (Perkin Elmer) and K<sub>i</sub> values were determined  
789 using GraphPad Prism version 7.

790

## 791 **Methods references**

- 792 38 Warne, T., Chirnside, J. & Schertler, G. F. Expression and purification of  
793 truncated, non-glycosylated turkey beta-adrenergic receptors for  
794 crystallization. *Biochim Biophys Acta* **1610**, 133-140, (2003).
- 795 39 Warne, T., Serrano-Vega, M. J., Tate, C. G. & Schertler, G. F. Development  
796 and crystallization of a minimal thermostabilised G protein-coupled receptor.  
797 *Protein Expr Purif* **65**, 204-213, (2009).
- 798 40 Kobashigawa, Y., Kumeta, H., Ogura, K. & Inagaki, F. Attachment of an  
799 NMR-invisible solubility enhancement tag using a sortase-mediated protein  
800 ligation method. *J Biomol NMR* **43**, 145-150, (2009).
- 801 41 Urbani, A. & Warne, T. A colorimetric determination for glycosidic and bile  
802 salt-based detergents: applications in membrane protein research. *Anal*  
803 *Biochem* **336**, 117-124, (2005).
- 804 42 Bowler, M. W. *et al.* MASSIF-1: a beamline dedicated to the fully automatic  
805 characterization and data collection from crystals of biological  
806 macromolecules. *J Synchrotron Radiat* **22**, 1540-1547, (2015).

10<sup>th</sup> December 2019

- 807 43 Svensson, O., Malbet-Monaco, S., Popov, A., Nurizzo, D. & Bowler, M. W.  
808 Fully automatic characterization and data collection from crystals of biological  
809 macromolecules. *Acta Crystallogr D Biol Crystallogr* **71**, 1757-1767, (2015).
- 810 44 Svensson, O., Gilski, M., Nurizzo, D. & Bowler, M. W. Multi-position data  
811 collection and dynamic beam sizing: recent improvements to the automatic  
812 data-collection algorithms on MASSIF-1. *Acta Crystallogr D Struct Biol* **74**,  
813 433-440, (2018).
- 814 45 Leslie, A. G. The integration of macromolecular diffraction data. *Acta*  
815 *Crystallogr D Biol Crystallogr* **62**, 48-57, (2006).
- 816 46 Evans, P. Scaling and assessment of data quality. *Acta Crystallogr D Biol*  
817 *Crystallogr* **62**, 72-82, (2006).
- 818 47 McCoy, A. J. *et al.* Phaser crystallographic software. *J Appl Crystallogr* **40**,  
819 658-674, (2007).
- 820 48 Murshudov, G. N. *et al.* REFMAC5 for the refinement of macromolecular  
821 crystal structures. *Acta Crystallogr D Biol Crystallogr* **67**, 355-367, (2011).
- 822 49 Emsley, P. & Cowtan, K. Coot: model-building tools for molecular graphics.  
823 *Acta Crystallogr D Biol Crystallogr* **60**, 2126-2132, (2004).
- 824 50 Gurevich, V. V. & Gurevich, E. V. The molecular acrobatics of arrestin  
825 activation. *Trends Pharmacol Sci* **25**, 105-111, (2004).
- 826 51 Banerjee, S., Huber, T. & Sakmar, T. P. Rapid incorporation of functional  
827 rhodopsin into nanoscale apolipoprotein bound bilayer (NABB) particles. *J*  
828 *Mol Biol* **377**, 1067-1081, (2008).
- 829 52 Ghosh, E. *et al.* Conformational Sensors and Domain Swapping Reveal  
830 Structural and Functional Differences between beta-Arrestin Isoforms. *Cell*  
831 *Rep* **28**, 3287-3299 e3286, (2019).
- 832 53 Ritchie, T. K. *et al.* Chapter 11 - Reconstitution of membrane proteins in  
833 phospholipid bilayer nanodiscs. *Methods Enzymol* **464**, 211-231, (2009).
- 834 54 Rigaud, J. L., Levy, D., Mosser, G. & Lambert, O. Detergent removal by non-  
835 polar polystyrene beads - Applications to membrane protein reconstitution and  
836 two-dimensional crystallization. *Eur Biophys J Biophys* **27**, 305-319, (1998).
- 837 55 Naydenova, K. & Russo, C. J. Measuring the effects of particle orientation to  
838 improve the efficiency of electron cryomicroscopy. *Nat Commun* **8**, (2017).
- 839 56 Mastronarde, D. N. Automated electron microscope tomography using robust  
840 prediction of specimen movements. *J Struct Biol* **152**, 36-51, (2005).

10<sup>th</sup> December 2019

- 841 57 Zivanov, J. *et al.* New tools for automated high-resolution cryo-EM structure  
842 determination in RELION-3. *Elife* **7**, (2018).
- 843 58 Tegunov, D. & Cramer, P. Real-time cryo-electron microscopy data  
844 preprocessing with Warp. *Nat Methods*, (2019).
- 845 59 Wood, C. *et al.* Collaborative Computational Project for Electron cryo-  
846 Microscopy. *Acta Crystallogr D* **71**, 123-126, (2015).
- 847 60 Adams, P. D. *et al.* PHENIX: a comprehensive Python-based system for  
848 macromolecular structure solution. *Acta Crystallogr D* **66**, 213-221, (2010).
- 849 61 Moriarty, N. W., Grosse-Kunstleve, R. W. & Adams, P. D. electronic Ligand  
850 Builder and Optimization Workbench (eLBOW): a tool for ligand coordinate  
851 and restraint generation. *Acta Crystallogr D Biol Crystallogr* **65**, 1074-1080,  
852 (2009).
- 853 62 Chen, V. B. *et al.* MolProbity: all-atom structure validation for  
854 macromolecular crystallography. *Acta Crystallogr D* **66**, 12-21, (2010).
- 855 63 Barad, B. A. *et al.* EMRinger: side chain directed model and map validation  
856 for 3D cryo-electron microscopy. *Nat Methods* **12**, 943-946, (2015).
- 857 64 Amunts, A. *et al.* Structure of the Yeast Mitochondrial Large Ribosomal  
858 Subunit. *Science* **343**, 1485-1489, (2014).
- 859 65 Carpenter, B. & Tate, C. G. Expression, Purification and Crystallisation of the  
860 Adenosine A2A Receptor Bound to an Engineered Mini G Protein. *Bio-*  
861 *Protocol* **7**, (2017).
- 862 66 Tan, Y. Z. *et al.* Addressing preferred specimen orientation in single-particle  
863 cryo-EM through tilting. *Nat Methods* **14**, 793-796, (2017).

864  
865  
866

867 **Extended Data Fig. 1 | The modulation of  $\beta_1$ AR agonist affinity by effector**  
868 **proteins. a-b**, Representative competition binding curves using either formoterol or  
869 isoprenaline, respectively, show the high-affinity state of  $\beta_1$ AR stabilised by either  
870 mini-G<sub>s</sub> or  $\beta$ arr1. Experiments (see Methods) to determine the high affinity state were  
871 performed in a molar excess of mini-G<sub>s</sub> (green curve) or  $\beta$ arr1 (red curve) and  
872 compared to the low affinity state (blue curves). Experiments were performed 2-4

10<sup>th</sup> December 2019

873 times in duplicate and errors represent the SEM. The apparent  $K_i$ s were determined  
874 using the Cheng-Prusoff equation and apparent  $K_{dS}$  for <sup>3</sup>H-DHA of 6 nM ( $\beta_{84_{6P}}$  and  
875  $\beta_{84_{6P}} + \beta_{arr1}$ ) and 1.5 nM ( $\beta_{84_{6P}} + \text{mini-G}_s$ ).  $K_i$  values for formoterol are  $1.5 \pm 0.4$   
876  $\mu\text{M}$  ( $\beta_{84_{6P}}$ ),  $42 \pm 18$  nM ( $\beta_{84_{6P}} + \beta_{arr1}$ ) and  $0.7 \pm 0.1$  nM ( $\beta_{84_{6P}} + \text{mini-G}_s$ ).  $K_i$   
877 values for isoprenaline are  $340 \pm 70$  nM ( $\beta_{84_{6P}}$ ),  $4.4 \pm 0.8$  nM ( $\beta_{84_{6P}} + \beta_{arr1}$ ) and  
878  $0.13 \pm 0.02$  nM ( $\beta_{84_{6P}} + \text{mini-G}_s$ ).

879

880 **Extended Data Fig. 2 | Cryo-EM single particle reconstruction of the  $\beta_1\text{AR-}$**   
881  **$\beta_{arr1}\text{-F}_{ab30}$  complex. a,** Representative micrograph (magnification 105,000 $\times$ ,  
882 defocus  $-1.9 \mu\text{m}$ ) of the  $\beta_1\text{AR-}\beta_{arr1}\text{-F}_{ab30}$  complex collected using a Titan Krios  
883 with the GIF Quantum K2 detector. **b,** Representative 2D class averages of the  $\beta_1\text{AR-}$   
884  $\beta_{arr1}\text{-F}_{ab30}$  complex determined using  $\sim 1$  million particles following 3D  
885 classification. Copies of the final reconstruction are juxtaposed to indicate relative  
886 orientations. **c,** FSC curve of the final reconstruction (black) showing an overall  
887 resolution of 3.3 Å using the gold standard FSC of 0.143. Shown in colour are the  
888 directional 3D-FSC curves calculated from the two half-maps<sup>66</sup>. **d,** Final  
889 reconstruction coloured by polypeptides (contour level 0.023). **e.** Local resolution  
890 estimation of the  $\beta_1\text{AR-}\beta_{arr1}\text{-F}_{ab30}$  map as calculated by RELION.

891

892 **Extended Data Fig. 3 | Flow chart of cryo-EM data processing.** Micrographs were  
893 collected during three sessions on a Titan Krios (between 48 h and 96 h long) using a  
894 30° stage tilt to reduce preferential particle orientation. Each dataset was corrected  
895 separately for drift, beam-induced motion and radiation damage. After focus gradient  
896 and CTF estimation, particles were picked using a Gaussian blob. At this stage, each  
897 of the LMB Krios2 datasets was split into 2 halves by micrographs, generating a total



10<sup>th</sup> December 2019

898 of five groups of particles. Each group was processed and curated independently. The  
899 number of particles from group G1 is indicated on the flowchart as a guide. At the  
900 bottom of the figure, the final number of particles is shown. Particles were submitted  
901 to two rounds of 3D classification using an *ab initio* model as a reference. In each  
902 round, classification was performed in six classes. The models with the best features  
903 were merged and refined together before correcting for per-particle beam-induced  
904 motion. Subtracted particles were generated by removing most of the non-receptor  
905 nanodisc signal and refined. 3D classification without alignment was performed in 6  
906 classes using a mask encompassing the entire complex. The models showing the best  
907 features were refined either individually or in combination. The quality of the  
908 particles was judged based on both resolution and map features and weighed against  
909 the size of the particle set (the resolution of the models refers to the resolution after  
910 refinement and calculation of gold-standard FSC of 0.143). The best particles from  
911 each group were merged and re-extracted. Following merging, the combined particle  
912 set was processed together except at the stage of per-particle beam-induced motion  
913 correction, where particles were split into their session-stacks for Bayesian polishing.  
914 Following penultimate refinement, particles were assigned to one of 19 optical groups  
915 (see Methods) and corrected for beam-tilt, per-micrograph astigmatism, anisotropic  
916 magnification and per-particle CTF estimation. A final model with 403,991 particles  
917 was refined and achieved a global resolution of 3.3 Å.

918

919 **Extended Data Fig. 4 | Cryo-EM map quality of the  $\beta_1$ AR- $\beta$ arr1-F<sub>ab</sub>30 complex**  
920 **and model validation. a**, Transmembrane helices of  $\beta_1$ AR with density shown as a  
921 mesh. **b**, Intracellular loop 2 of  $\beta_1$ AR. For clarity, the neighbouring  $\beta$ arr1 side chains  
922 are depicted without density. **c**, Extracellular loop 3 of  $\beta_1$ AR and the adjacent helical

10<sup>th</sup> December 2019

923 turns of H6 and H7. All density maps in panels **a-c** were visualised using Chimera  
924 (contour level 0.017) and encompass a radius of 2 Å around the region of interest. **d**,  
925 FSC of the refined model versus the map (green curve) and FSC<sub>work</sub>/FSC<sub>free</sub> validation  
926 curves (blue and red curves, respectively). **e**, Amino acid sequence of the β<sub>1</sub>AR  
927 construct used for the cryo-EM structure determination. The residues are numbered  
928 according to the wild-type sequence of β<sub>1</sub>AR. Residues are coloured according to how  
929 they have been modelled. Black, good density allows the side chain to be modelled;  
930 red, limited density for the side chain, therefore the side chain has been truncated to  
931 Cβ; blue, no density observed and therefore the residue was not modelled. In some  
932 cases, side chains were included where there was only weak density as it aided  
933 maintenance of main chain geometry during restrained refinement. Regions  
934 highlighted in grey represent the transmembrane α-helices, amphipathic helix 8 is  
935 highlighted in yellow, and phosphorylated residues are highlighted in green. The  
936 dashes represent amino acid residues deleted.

937

938 **Extended Data Fig. 5 | Cryo-EM map quality of β<sub>1</sub>AR-βarr1-F<sub>ab</sub>30 in the**  
939 **orthosteric binding site, arrestin-binding pocket and phosphorylated C-**  
940 **terminus.** Unless otherwise stated, density maps (visualised in Chimera) are depicted  
941 with contour level 0.017 and encompass a radius of 2 Å around the region of interest.  
942 **a**, Formoterol and the neighbouring side chains in the orthosteric binding site. **b**, The  
943 finger loop of βarr1. **c**, The β<sub>1</sub>AR side chains neighbouring the finger loop of βarr1. **d**,  
944 The phosphorylated V<sub>2</sub>R<sub>6P</sub> C-terminus. Inset, interaction between the V<sub>2</sub>R<sub>6P</sub> phospho-  
945 threonine dyad and the βarr1 lariat loop. Density in the inset is depicted with contour  
946 level 0.01 (carve radius 2 Å).

947

10<sup>th</sup> December 2019

948 **Extended Data Fig. 6 | Comparison of the active states of arrestin. a,**  
949 superposition of arrestin molecules in the complexes of  $\beta_1$ AR- $\beta$ arr1 (green) and  
950 rhodopsin-arrestin (pale brown). The different angle between the respective receptors  
951 and coupled arrestins is shown by the 20° difference in tilt of H3 (blue, H3 in  
952 rhodopsin; red, H3 in  $\beta_1$ AR). **b,** superposition of the active state of  $\beta$ arr1 (pale brown;  
953 PDB code 4JQI) not bound to receptor and  $\beta$ arr1 (green) coupled to  $\beta_1$ AR. The  
954 phosphopeptides are shown as sticks: yellow carbon atoms, V<sub>2</sub>Rpp in 4JQI; magenta  
955 carbon atoms, V<sub>2</sub>R<sub>6P</sub> in the  $\beta_1$ AR- $\beta$ arr1 complex. **c,** superposition of  $\beta_1$ AR and  $\beta_2$ AR  
956 (pink and purple cartoons, respectively) coupled to either  $\beta$ arr1 (magenta surface) or  
957 G<sub>s</sub> (blue and purple surfaces), respectively.

958

959 **Extended Data Fig. 7 | Comparison of the receptor-G protein and receptor-**  
960 **arrestin binding interface.** Residues in GPCRs that make contact (within 3.9 Å) of  
961 arrestins or G proteins are highlighted. **a,** sequence of turkey  $\beta_1$ AR is depicted. **b,**  
962 sequence of human rhodopsin is depicted. Plots were made using GPCRdb.

963

964 **Extended Data Fig. 8 | Comparison of the S-arrestin and  $\beta$ arr1 interfaces with**  
965 **GPCRs.** A snake plot (GPCRdb) of human  $\beta$ arr1 depicts the secondary structure  
966 elements in the protein, with amino acid residues making contact with  $\beta_1$ AR coloured  
967 blue. Equivalent regions in murine S-arrestin that make contact to rhodopsin are  
968 shown in red. Alignments of human arrestins show the variation of amino acid  
969 sequences within these specific regions, with residues making contact to the  
970 respective receptors highlighted.

971

10<sup>th</sup> December 2019

972 **Extended Data Fig. 9 | Lipid-interacting residues in  $\beta$ arr1.**  $\beta$ <sub>1</sub>AR is depicted in  
973 surface representation and  $\beta$ arr1 as a cartoon (green) with atoms predicted to be  
974 within the head group region of the lipid bilayer shown as spheres: oxygen, red;  
975 nitrogen, blue; carbon, green or cyan. Residues coloured cyan are predicted to be  
976 entirely within the lipid head group region, whilst the carbons coloured green are the  
977 portions of these side chains that are potentially interacting with lipid head groups. **a**,  
978 view of the lipid interacting surface viewed through the receptor; **b**, view parallel to  
979 the membrane plane.

980

981 **Extended Data Fig. 10 | Description of constructs used for structural studies and**  
982 **the purification strategy.** **a**, cartoon of the constructs used for X-ray crystallography  
983 (trx- $\beta$ <sub>1</sub>AR), cryo-EM ( $\beta$ 83S) and pharmacology ( $\beta$ 84S) indicating the sites of  
984 truncations and point mutations. **b**, Purification scheme for the preparation of  
985 phosphorylated  $\beta$ <sub>1</sub>AR coupled to  $\beta$ arr1 for structure determination by cryo-EM.

986

987

988 **Extended Data Table 1. Cryo-EM data collection and refinement statistics.**

989

990 **Extended Data Table 2. X-ray data collection and refinement statistics.**

991

992

Figure 1

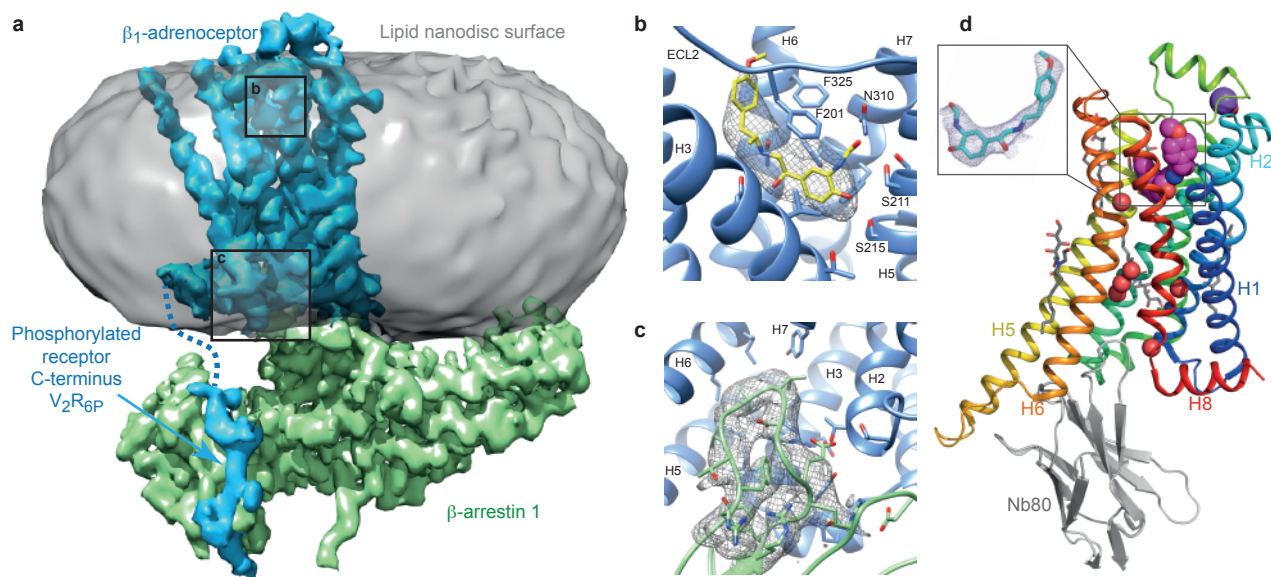

Figure 2

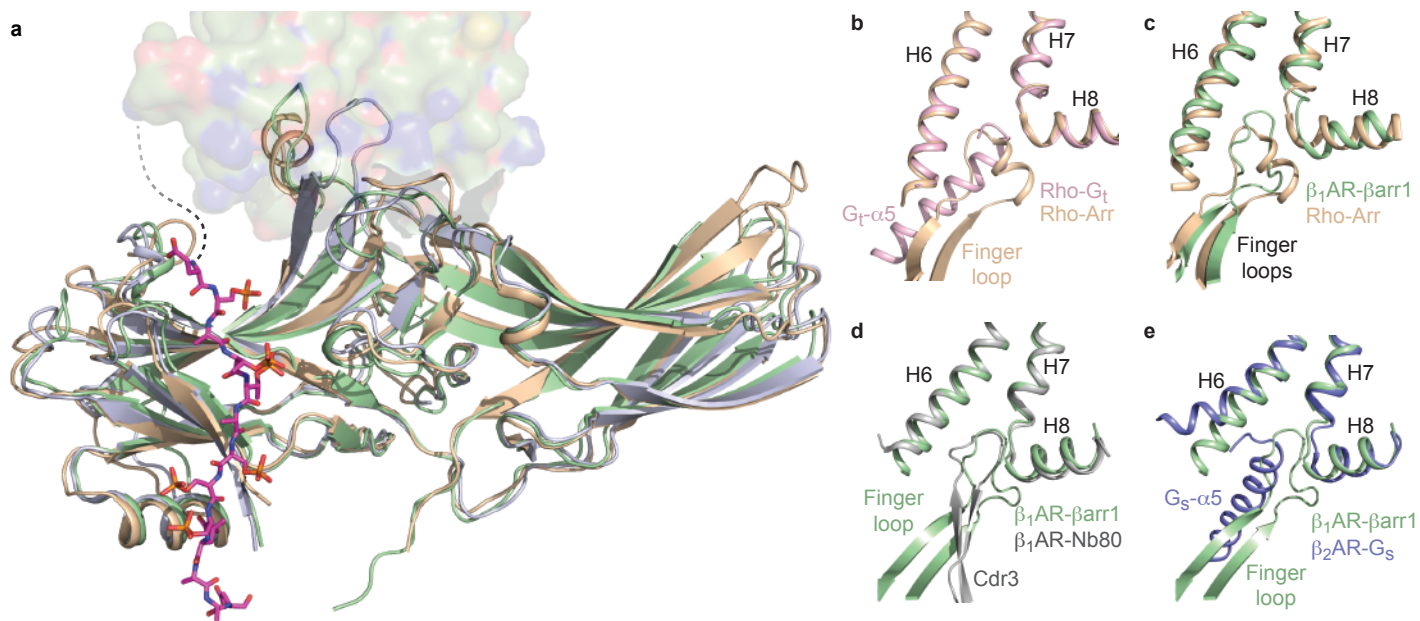

Figure 3

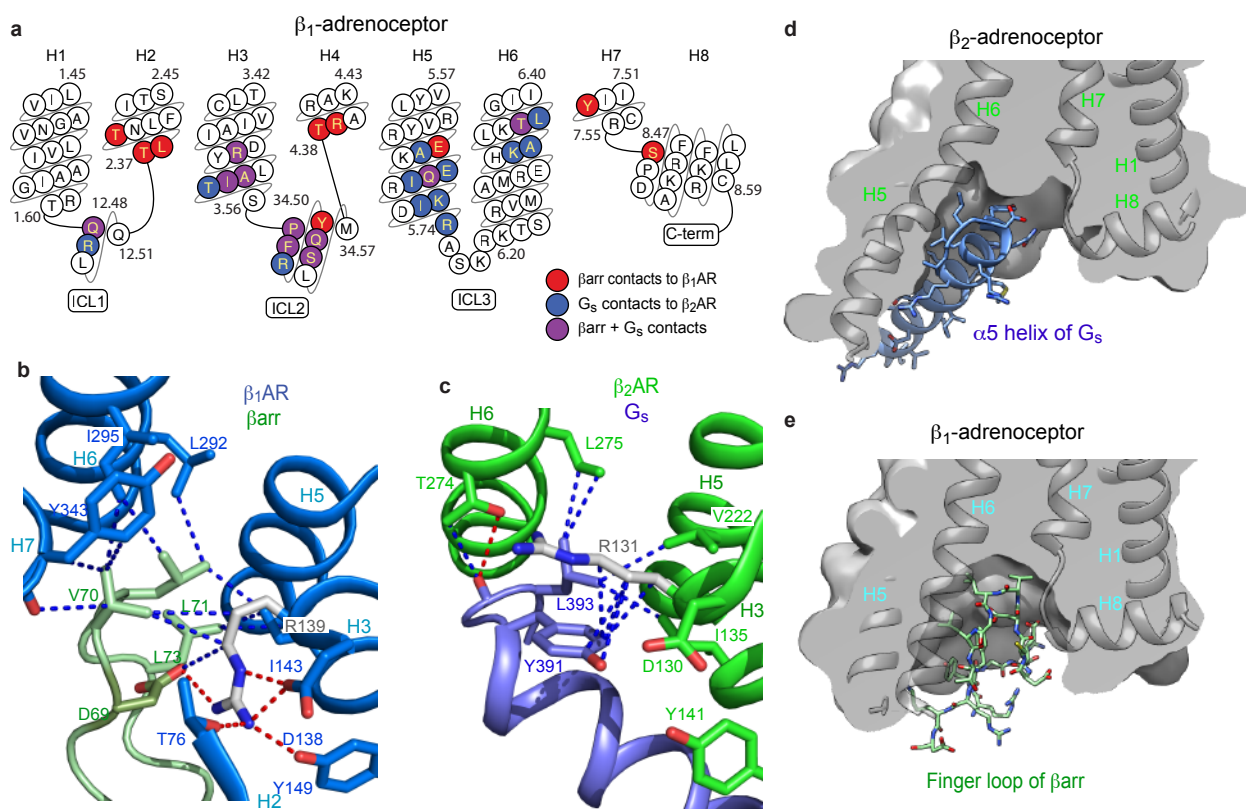

Figure 4

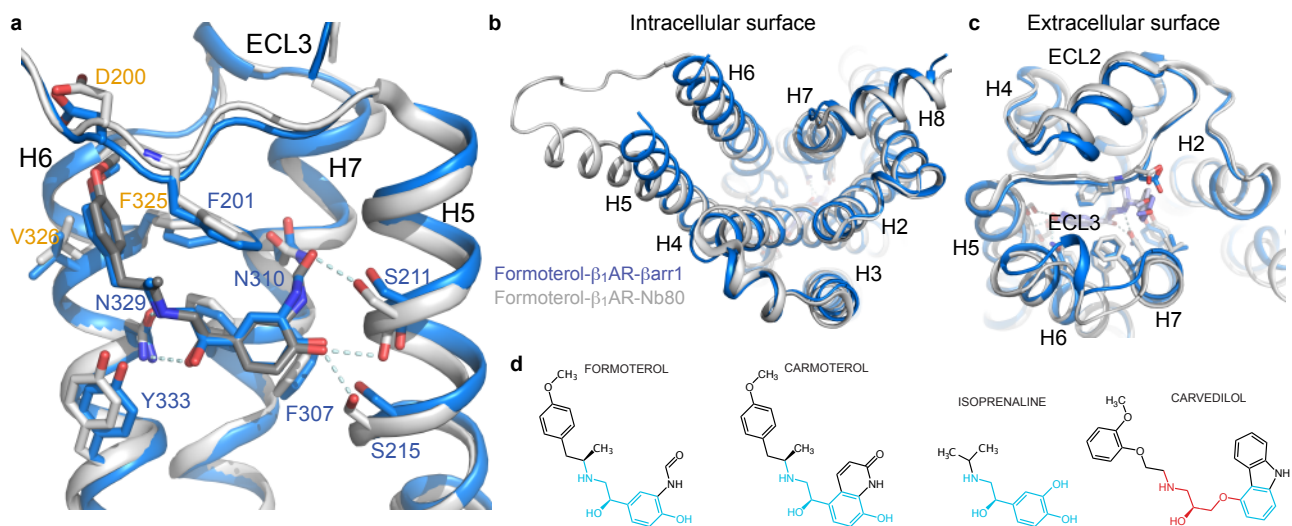



## Extended Data Figure 1

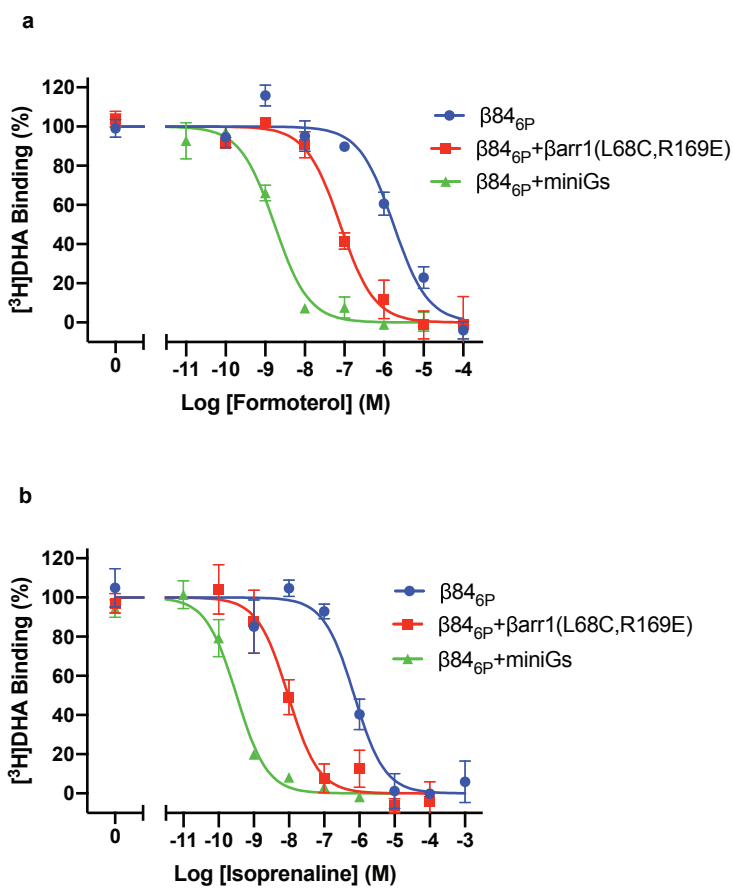

Extended Data Fig. 2

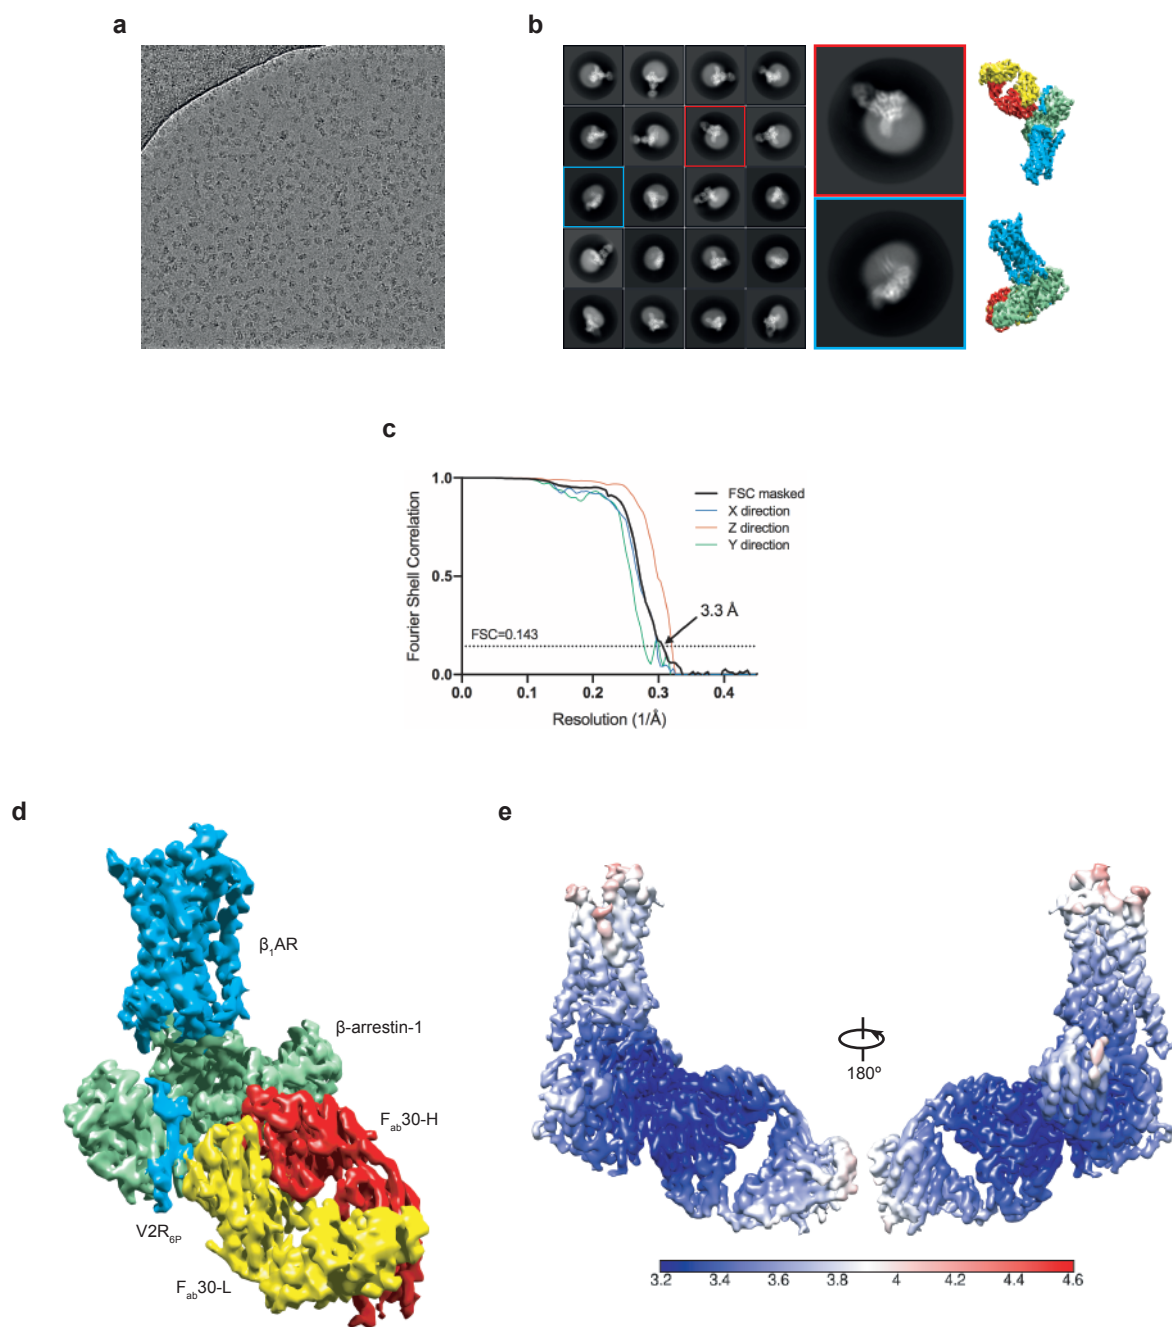

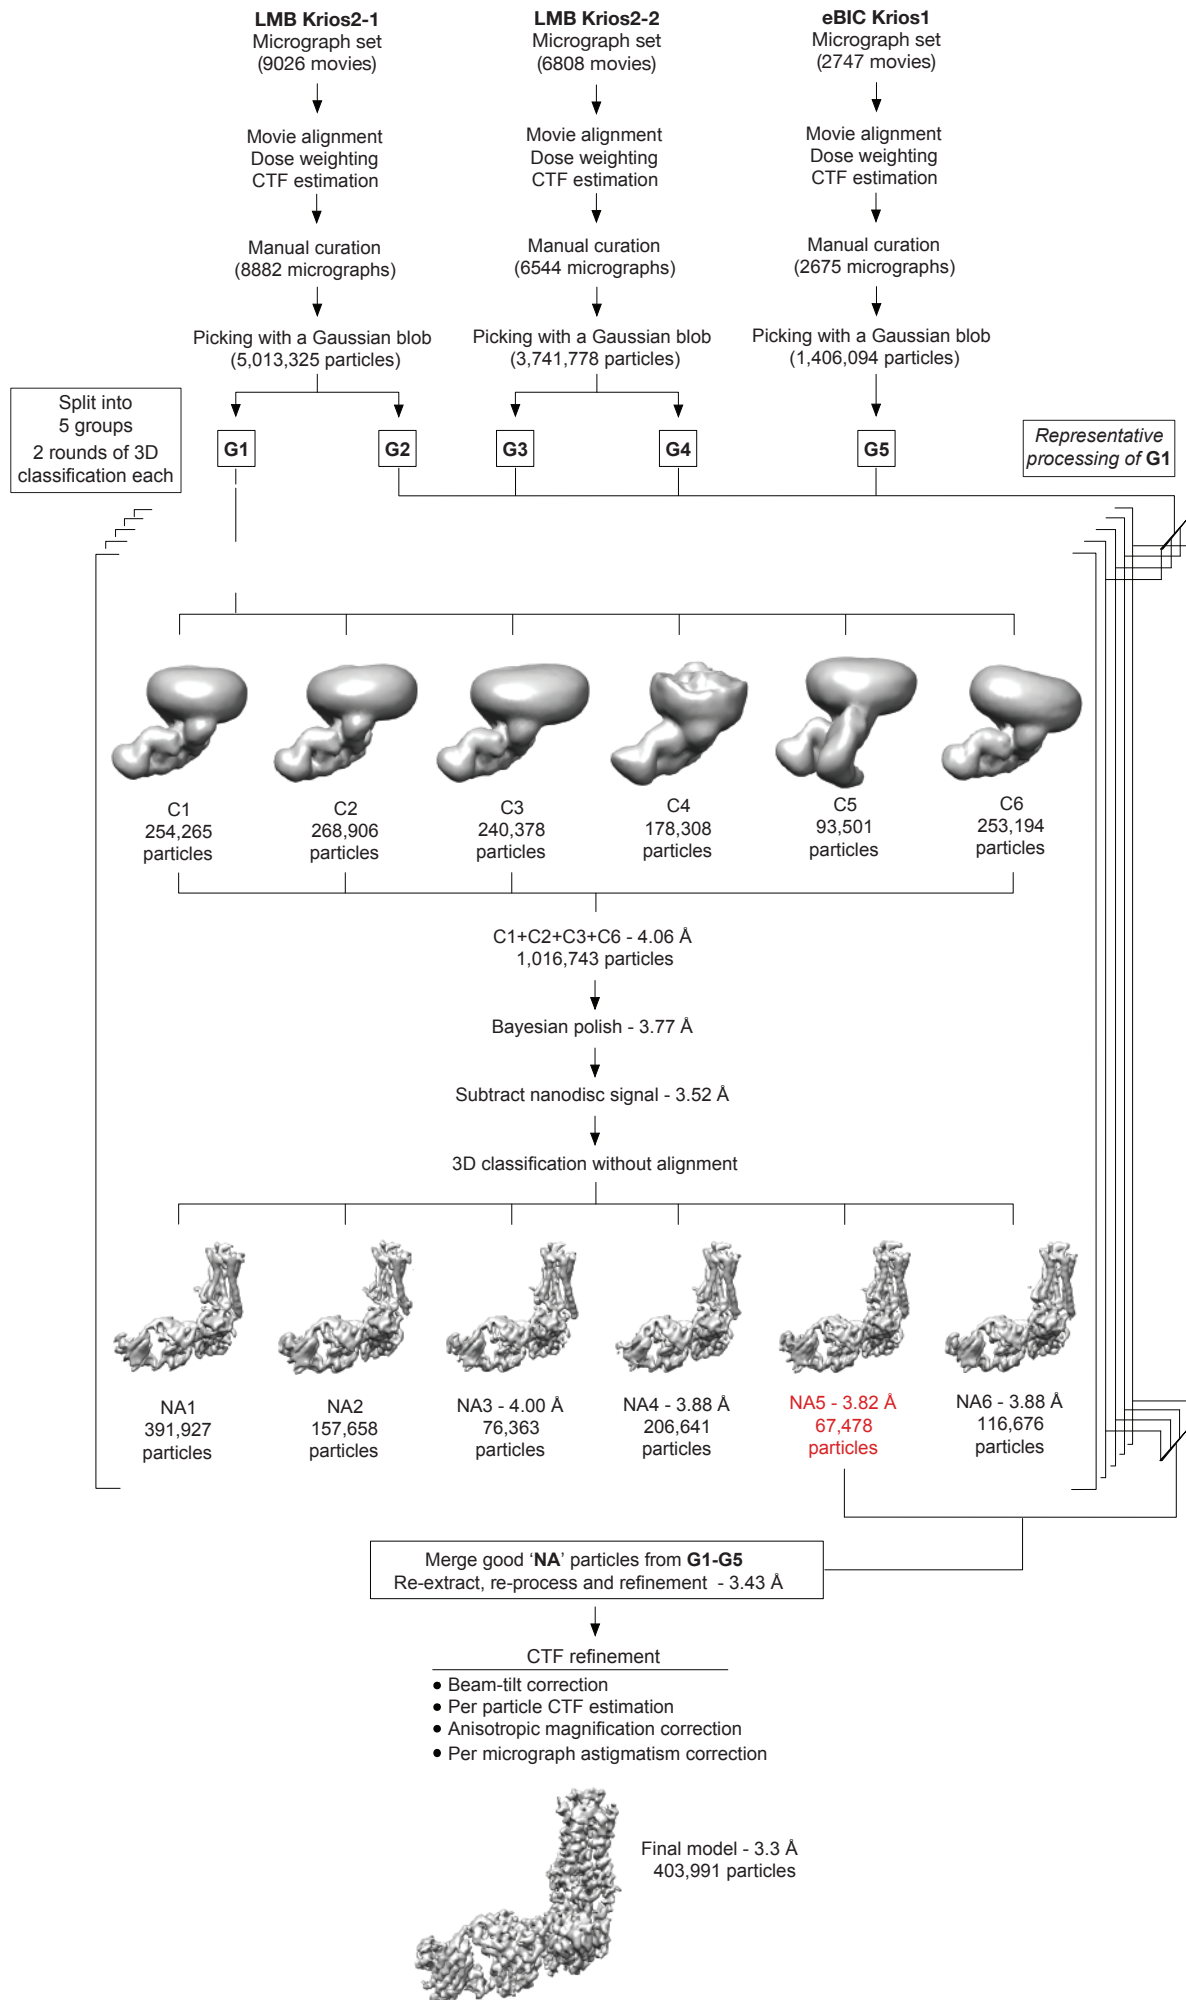

Extended Data Fig. 4

a

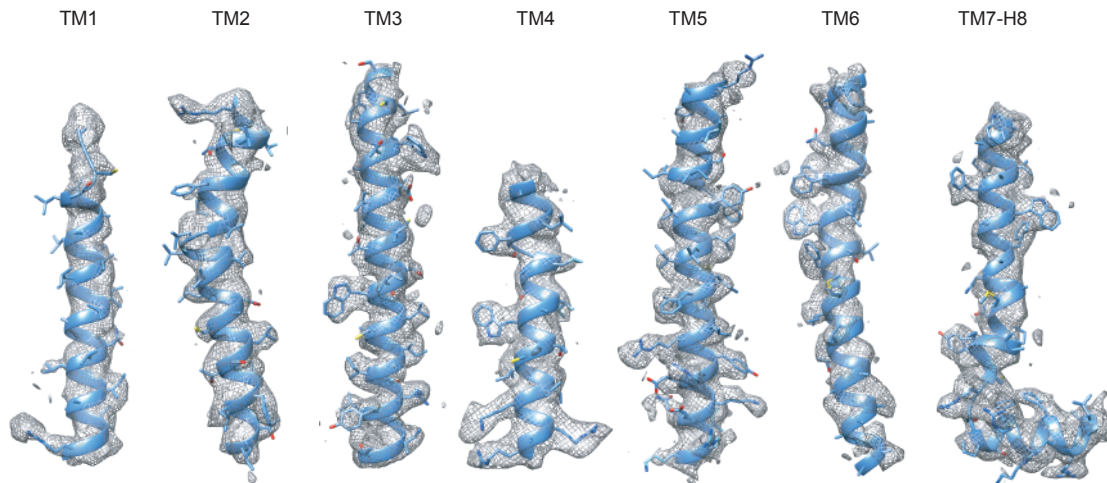

b

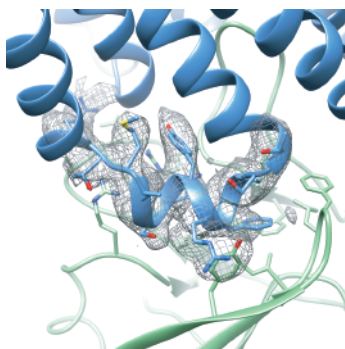

c

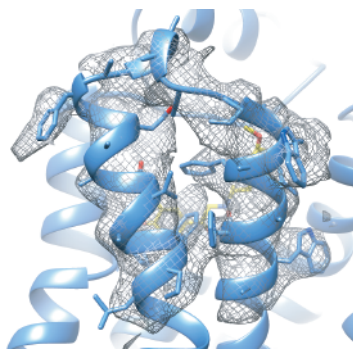

d

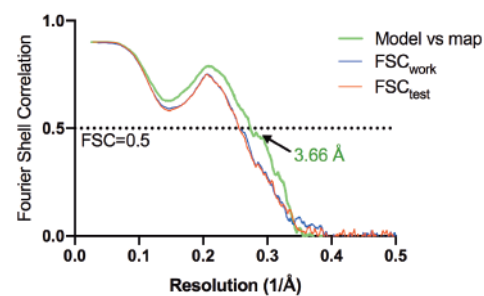

e

```

31  GAELLSQQWEAGCSLLMALVVLLIVAGNVLVIAAIGRTQRLQTLTNLFITSLACADLVV  90
91  GLLVVPPGATLVCRGTWLWGSFLCELWTSLDVLCVTASIWTLCVIAIDRYLAITSPFRYQ  150
151 SLMTRARAKVICTVWASISLVFLPIMMHWWRDEDPQALKCYQDPGCCDFVTNRAYAIA  210
211 SSIISFYIPLLIMIFVYLRVYREAKEQIRKIDRASKRKTSR-----  270
271 -----VMAMREHKALKTLGIIMGVFTLCWLPFFLVNIVNVFNRDLPKWLFFVAFNW  330
331 LGYANSAMNPIIYCRSPDFRKAFKRLLAARGRPLPETGGGDESATIASSSLAKDTSS

```

Key:

- No density, nothing modeled
- Weak density, side-chain left unmodeled
- Weak density, side-chain modeled to maintain main chain geometry
- Side chains modeled
- Phospho-residues modeled

Extended Data Fig. 5

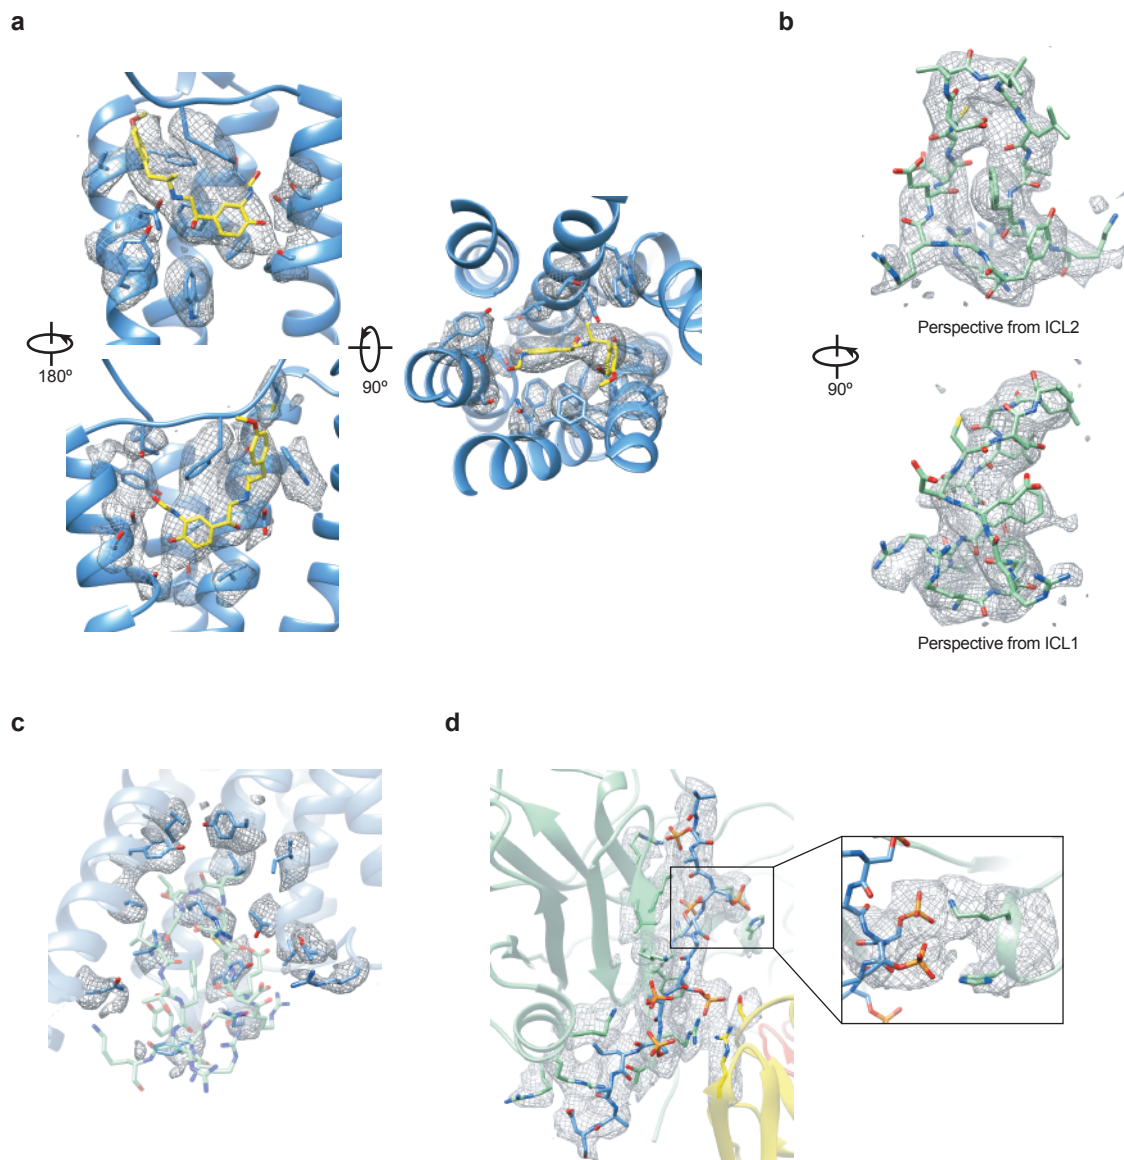

Extended Data Fig. 6

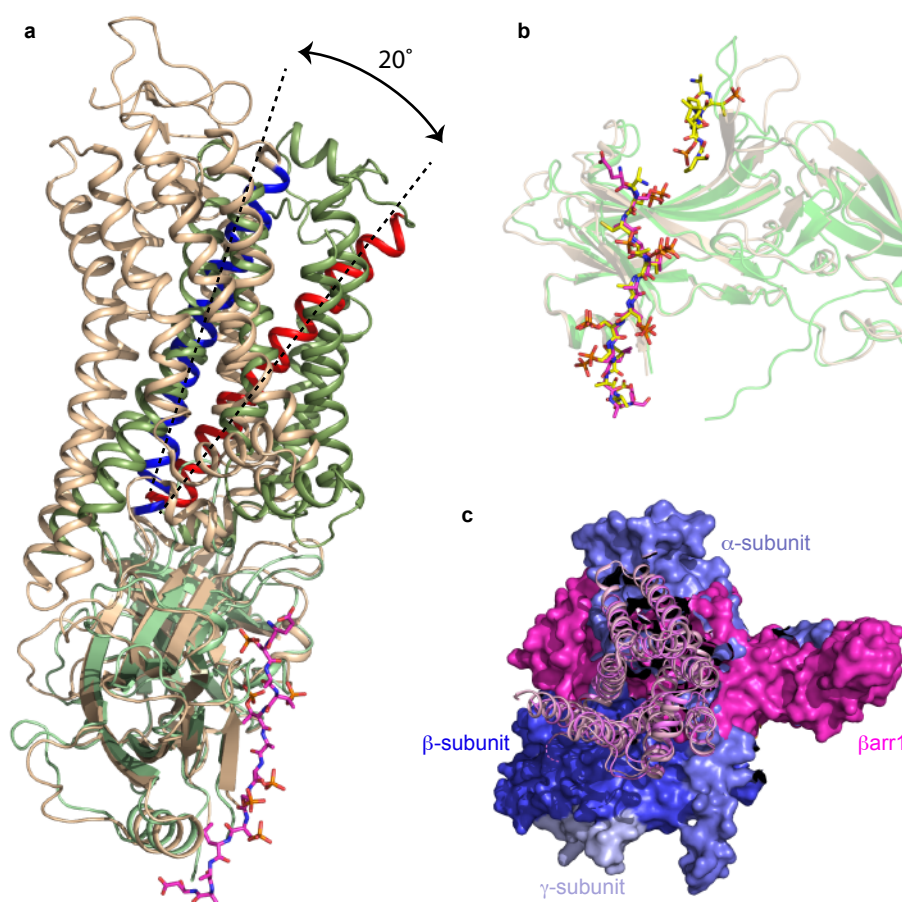

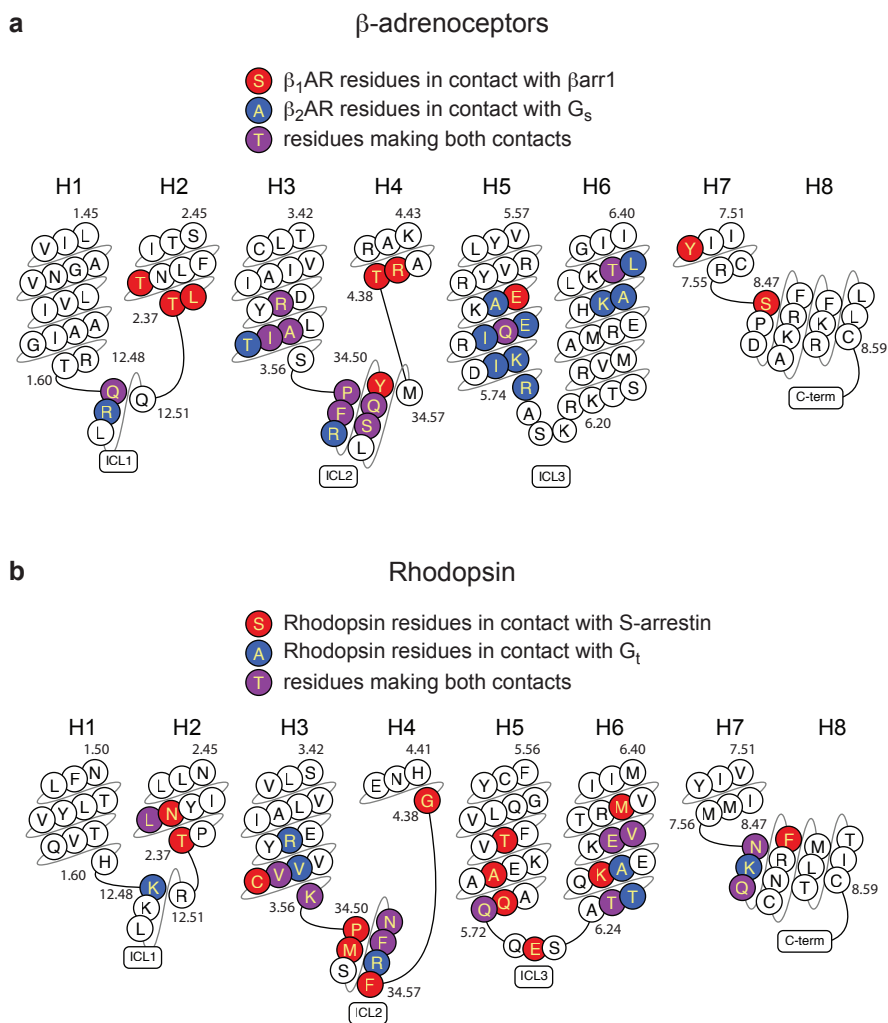

Extended Data Fig. 8

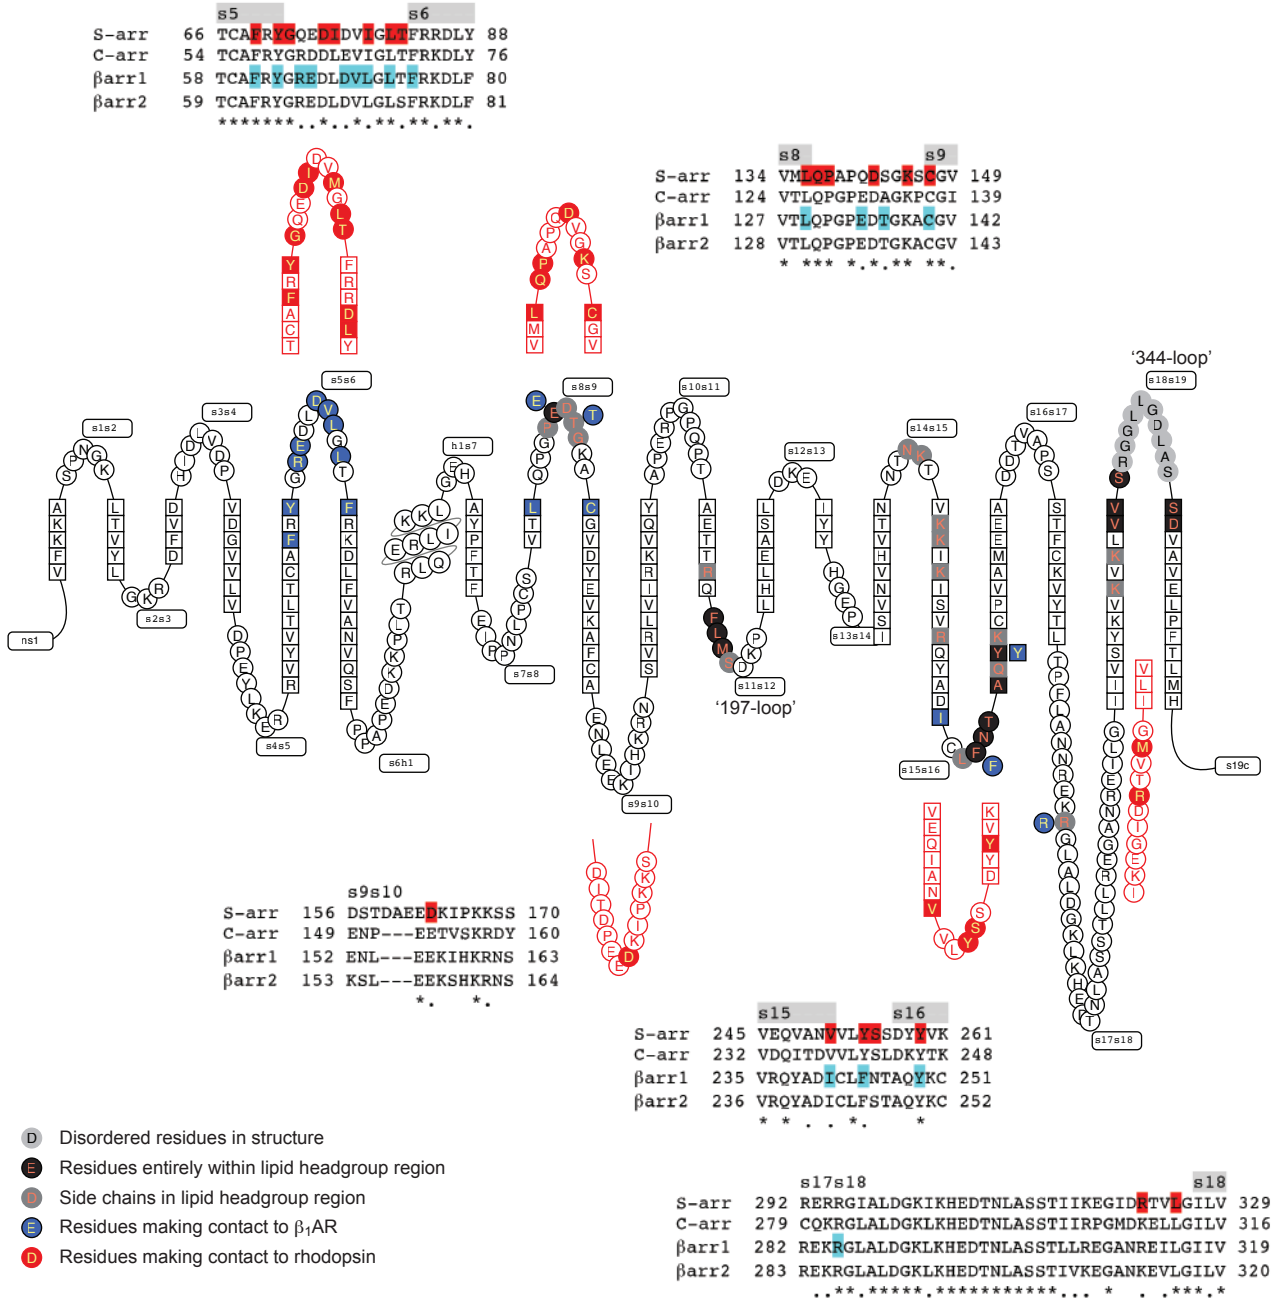



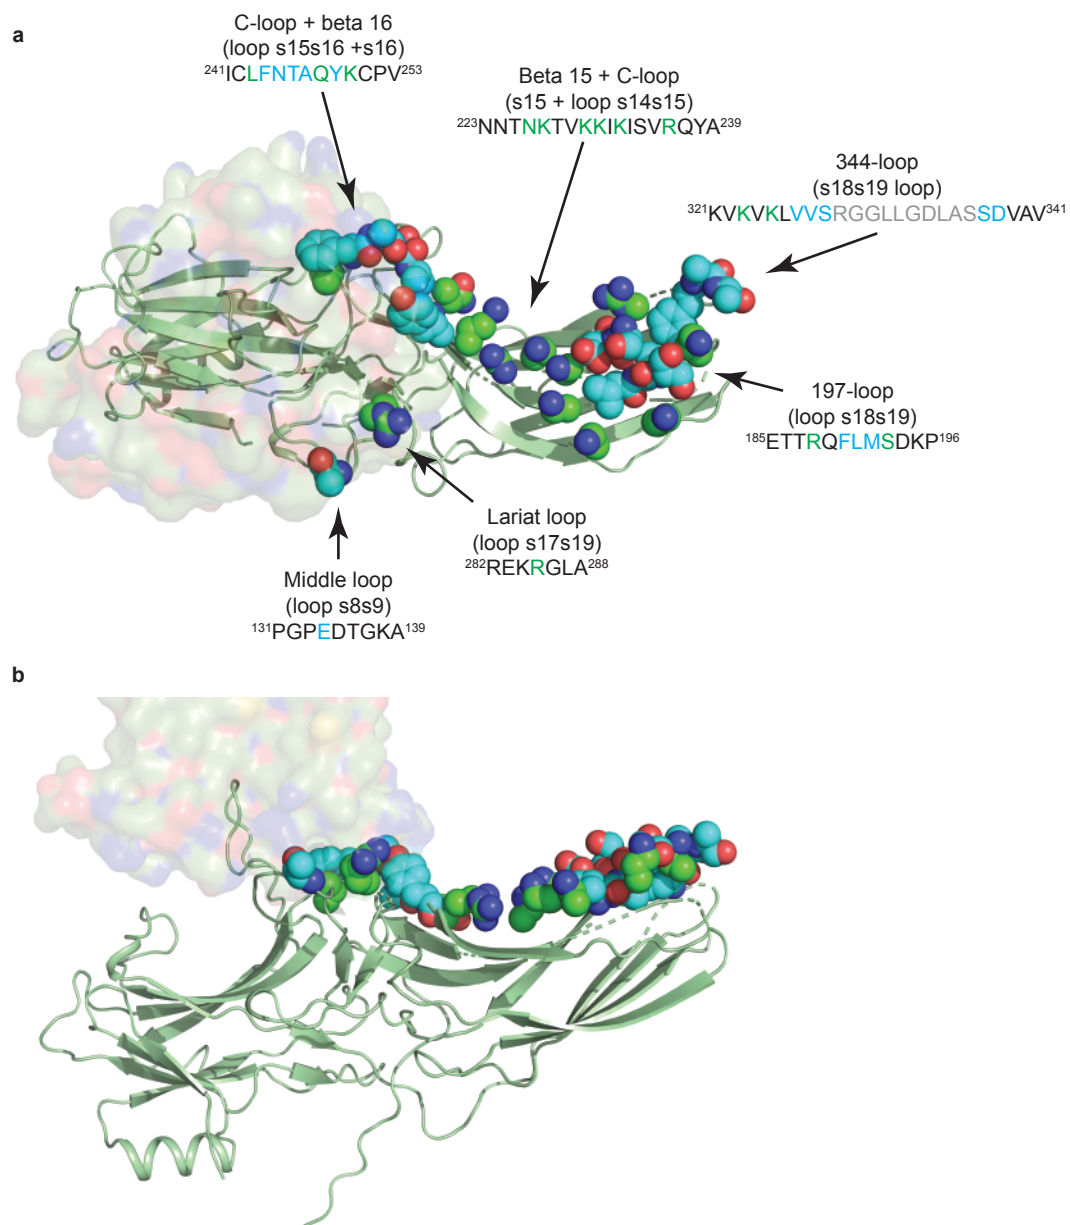

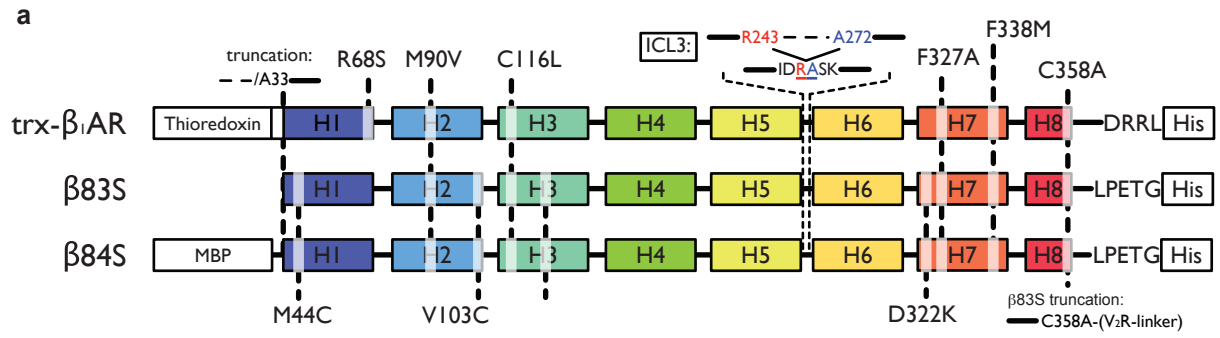

**b**

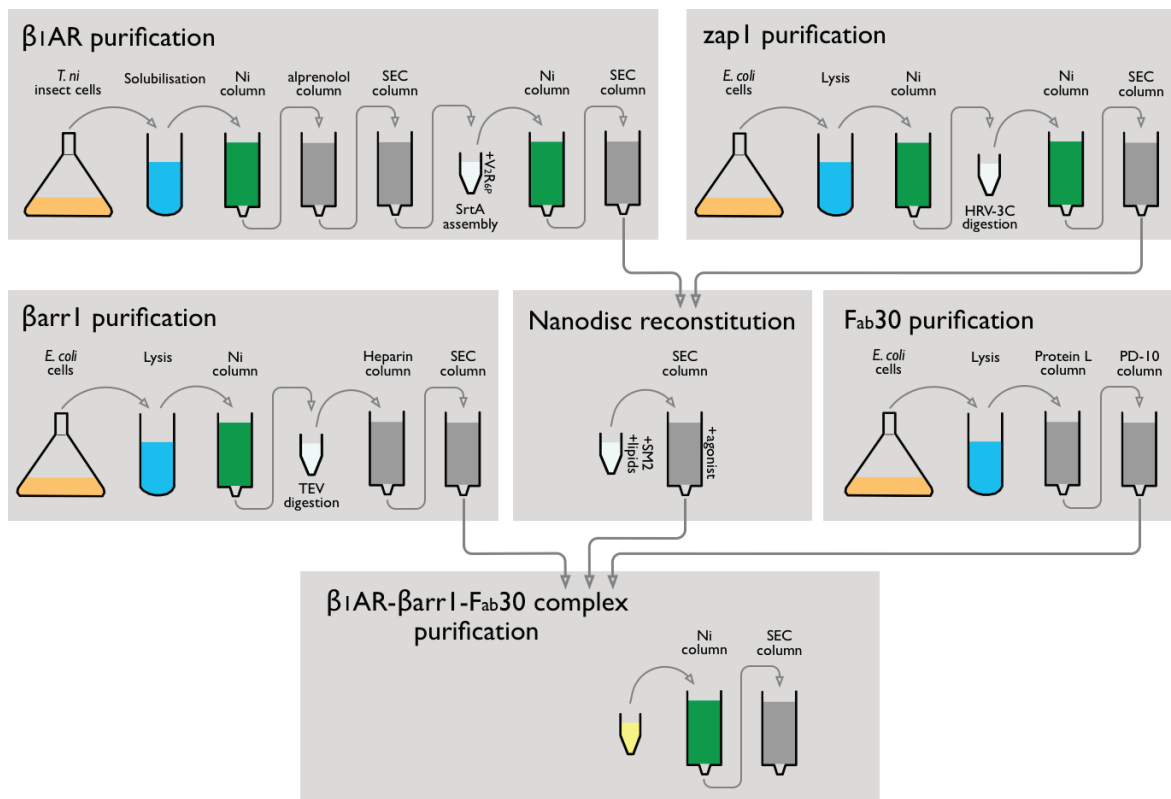

## Extended Data Table 1 | Data collection and refinement statistics

|                                                     | formoterol-bound $\beta_1$ AR- $\beta$ -arrestin-1-Fab30<br>(EMDB-10515)<br>(PDB 6TKO) |              |                 |
|-----------------------------------------------------|----------------------------------------------------------------------------------------|--------------|-----------------|
| Session                                             | LMB Krios2-1                                                                           | LMB Krios2-2 | DLS eBIC Krios1 |
| <b>Data collection and processing</b>               |                                                                                        |              |                 |
| Magnification                                       | 105,000x                                                                               | 105,000x     | 130,000x        |
| Voltage (kV)                                        | 300                                                                                    | 300          | 300             |
| Electron exposure (e <sup>-</sup> /Å <sup>2</sup> ) | 51                                                                                     | 49           | 45              |
| Defocus range (μm)                                  | -1.2 to -3.0                                                                           | -1.2 to -3.0 | -1.2 to -3.0    |
| Pixel size (Å)                                      | 1.1                                                                                    | 1.1          | 1.047           |
| Symmetry imposed                                    | C1                                                                                     | C1           | C1              |
| Initial particle images <sup>a</sup> (no.)          | 2,257,195                                                                              | 1,959,236    | 448,633         |
| Contribution to final particle images (no.)         | 175,204                                                                                | 183,140      | 45,647          |
| Final particle images (no.)                         |                                                                                        | 403,991      |                 |
| Map resolution (Å)                                  |                                                                                        | 3.3          |                 |
| FSC threshold                                       |                                                                                        | 0.143        |                 |
| Map resolution range <sup>b</sup> (Å)               |                                                                                        | ~3.2 to ~4.5 |                 |
| <b>Refinement</b>                                   |                                                                                        |              |                 |
| Initial model used (PDB code)                       |                                                                                        | 6IBL, 4JQI   |                 |
| Model resolution <sup>c</sup> (Å)                   |                                                                                        | 3.66         |                 |
| FSC threshold                                       |                                                                                        | 0.5          |                 |
| Map sharpening <i>B</i> factor (Å <sup>2</sup> )    |                                                                                        | -80          |                 |
| Model composition                                   |                                                                                        |              |                 |
| Non-hydrogen atoms                                  |                                                                                        | 8085         |                 |
| Protein residues                                    |                                                                                        | 1052         |                 |
| Ligands                                             |                                                                                        | 25           |                 |
| <i>B</i> factors (Å <sup>2</sup> )                  |                                                                                        |              |                 |
| Protein                                             |                                                                                        | 80.5         |                 |
| Ligand                                              |                                                                                        | 115          |                 |
| R.m.s. deviations                                   |                                                                                        |              |                 |
| Bond lengths (Å)                                    |                                                                                        | 0.001        |                 |
| Bond angles (°)                                     |                                                                                        | 0.411        |                 |
| Validation                                          |                                                                                        |              |                 |
| Molprobrity score                                   |                                                                                        | 1.06         |                 |
| Clashscore                                          |                                                                                        | 2.75         |                 |
| Poor rotamers (%)                                   |                                                                                        | 0.23         |                 |
| EMRinger score                                      |                                                                                        | 2.06         |                 |
| Ramachandran plot                                   |                                                                                        |              |                 |
| Favored (%)                                         |                                                                                        | 99.02        |                 |
| Allowed (%)                                         |                                                                                        | 0.98         |                 |
| Disallowed (%)                                      |                                                                                        | 0            |                 |

<sup>a</sup>After 3D classification.

<sup>b</sup>Local resolution range.

<sup>c</sup>Resolution at which FSC between map and model is 0.5.

## Extended Data Table 2 | X-ray data collection and refinement statistics

|                                                    | formoterol-bound $\text{trx-}\beta_1\text{AR-Nb80}$<br>(PDB 6IBL) |
|----------------------------------------------------|-------------------------------------------------------------------|
| <b>Data statistics</b>                             |                                                                   |
| Number of crystals                                 | 1                                                                 |
| Space group                                        | P 2 <sub>1</sub> 2 <sub>1</sub> 2 <sub>1</sub>                    |
| Cell dimensions <i>a</i> , <i>b</i> , <i>c</i> (Å) | 116.6, 121.1, 129.8                                               |
| Resolution range (Å)                               | 44.28-2.7 (2.79-2.7) <sup>a</sup>                                 |
| Unique reflections                                 | 50611 (4416) <sup>a</sup>                                         |
| Completeness before truncation (%)                 | 99.0 (95.3) <sup>a</sup>                                          |
| Multiplicity                                       | 4.6 (4.7) <sup>a</sup>                                            |
| Mean I/σI                                          | 6.6 (1.7) <sup>a</sup>                                            |
| R <sub>merge</sub>                                 | 0.151 (0.936) <sup>a</sup>                                        |
| CC <sub>1/2</sub> =0.3 h, k, l axes & overall (Å)  | 2.7, 3.62, 3.43, <b>2.92</b>                                      |
| <b>Refinement statistics</b>                       |                                                                   |
| Resolution (Å)                                     | 88.6-2.7 (2.78-2.7) <sup>a</sup>                                  |
| Completeness, truncated data (%)                   | 62.71 (2.78)                                                      |
| No. of reflections                                 | 30378                                                             |
| R <sub>work</sub> /R <sub>free</sub> (%)           | 0.242/0.276 (0.323/0.348) <sup>a</sup>                            |
| No. of atoms                                       | 8271                                                              |
| Protein                                            | 7984                                                              |
| Ligands & detergents                               | 258                                                               |
| Water                                              | 29                                                                |
| B-factors (Å <sup>2</sup> )                        |                                                                   |
| Protein                                            | 70.2                                                              |
| Ligand & detergents                                | 57.9, 73.8                                                        |
| Waters                                             | 38.5                                                              |
| R.M.S.D.                                           |                                                                   |
| Bond lengths (Å)                                   | 0.008                                                             |
| Bond angles (°)                                    | 1.17                                                              |

<sup>a</sup>Outer resolution shell.
